# Supplementary material
Source: PubMed Central journal article supplement (PMC3567736)
Supplement: 1212ad9d8850f0f307b410de3bb80756_genetics.112.147199-2.pdf [file 1212ad9d8850f0f307b410de3bb80756_genetics.112.147199-2.pdf]

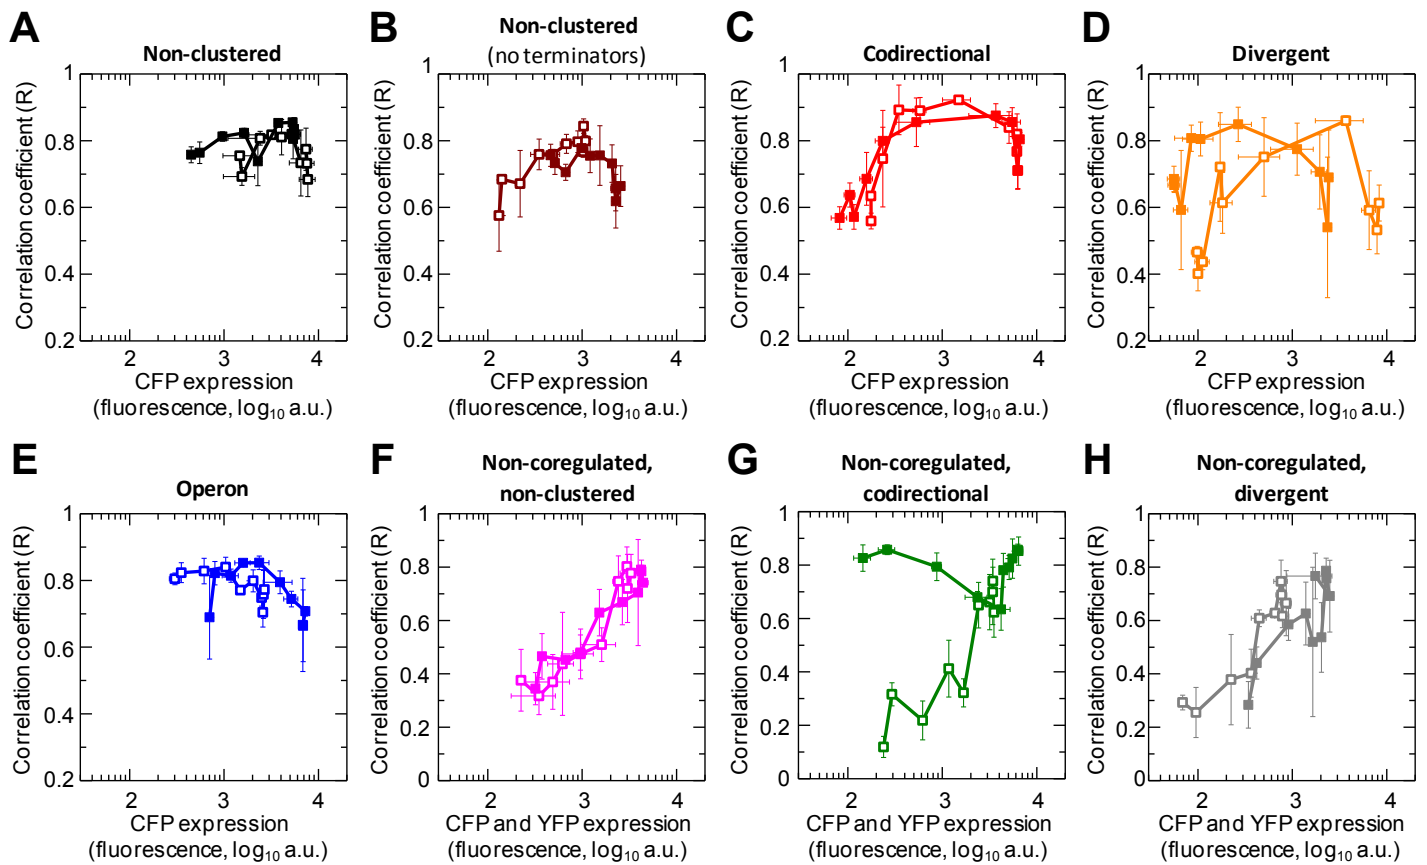

**Figure S8** Correlation coefficient as a function of mean expression for clustered and non-clustered gene arrangements. (A-H) Each panel shows the correlation coefficient for a different gene arrangement. Data symbols indicate the gene arrangements shown in **Figures 1A** and **3A**. In addition we include non-clustered genes without terminators (maroon symbols, **panel B**). All cells are included in the analysis. Error bars indicate the s.e.m. (number of replicates is stated in the legends of **Figures 1A** and **3A**).
