# Supplementary material
Source: PubMed Central journal article supplement (PMC3567736)
Supplement: 1267efc8857722f5dc282ea45d20687b_genetics.112.147199-4.pdf [file 1267efc8857722f5dc282ea45d20687b_genetics.112.147199-4.pdf]

**LEGEND**

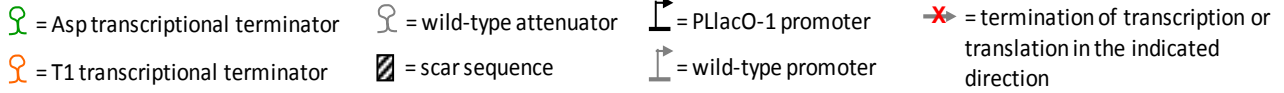

**WILD-TYPE CHROMOSOMAL ARRANGEMENTS**

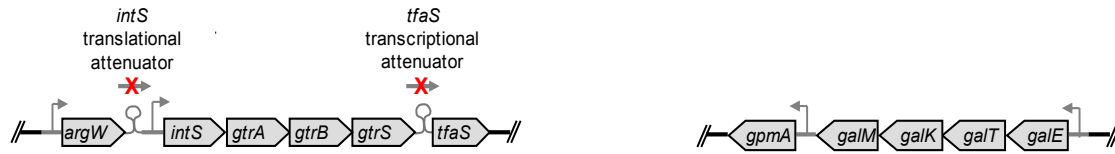

**NON-CLUSTERED**

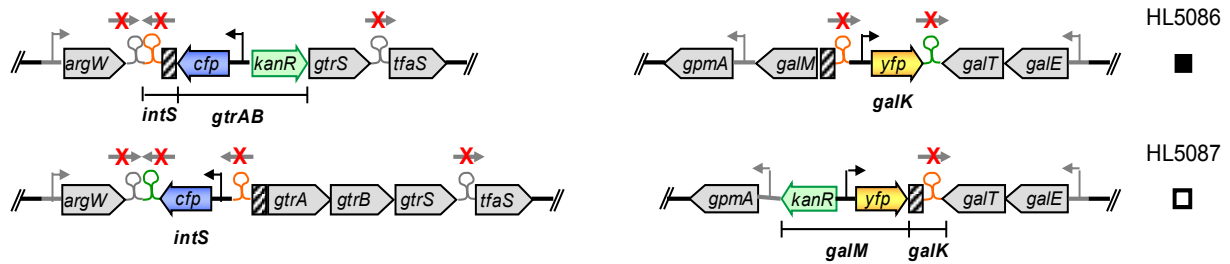

**CLUSTERED (Codirectional)**

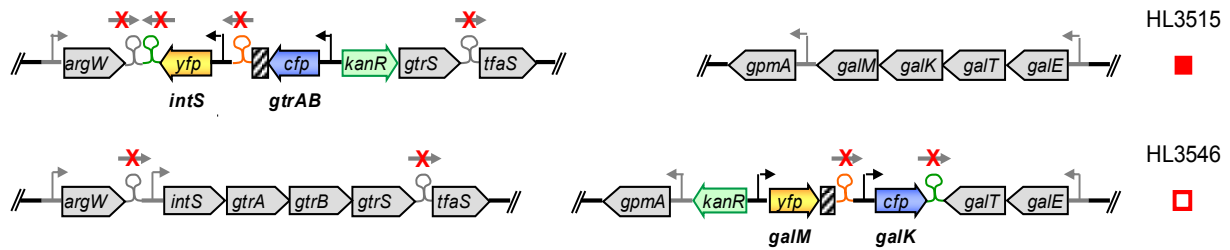

**CLUSTERED (Operon)**

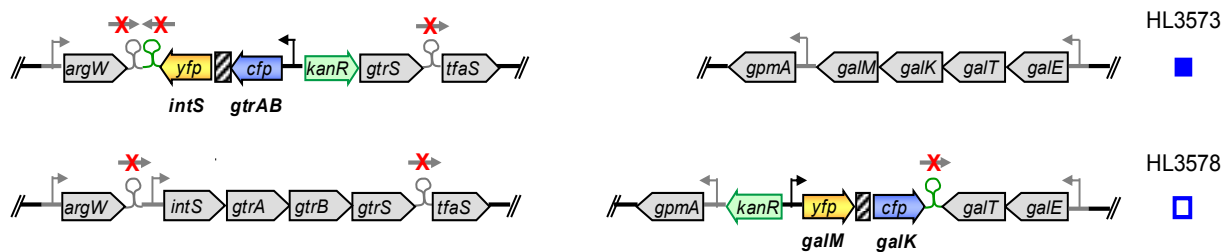

**CLUSTERED (Divergent)**

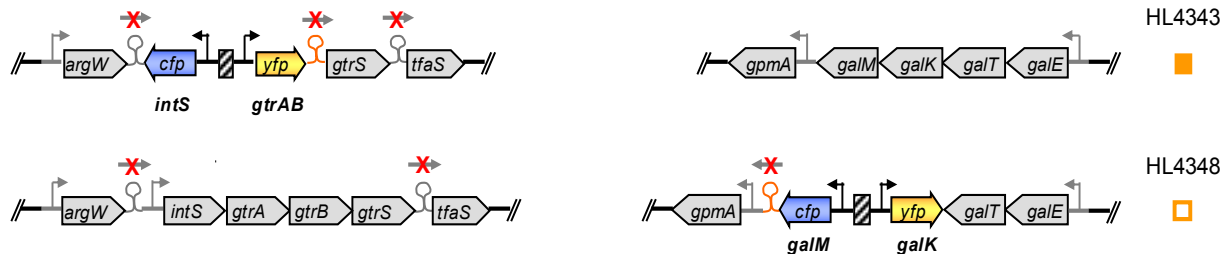

**Figure S1** Details of the non-clustered and clustered gene arrangements shown in **Figure 1A**.
