# Supplementary material
Source: PubMed Central journal article supplement (PMC3567736)
Supplement: 6974a71c93ab80883cad305df885b2f1_genetics.112.147199-12.pdf [file 6974a71c93ab80883cad305df885b2f1_genetics.112.147199-12.pdf]

**LEGEND**

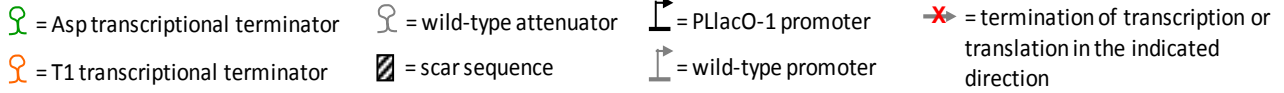

**WILD-TYPE CHROMOSOMAL ARRANGEMENTS**

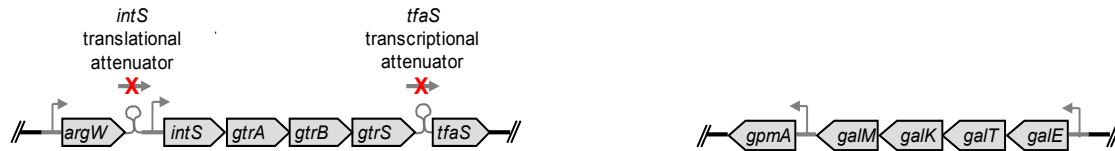

**NON-CLUSTERED**

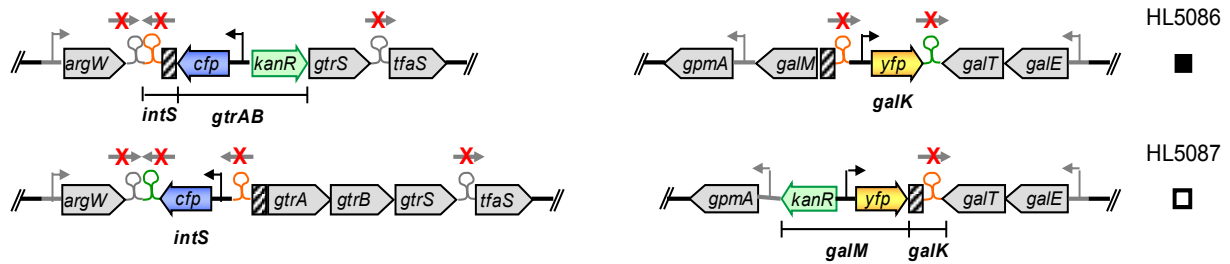

**CLUSTERED (Codirectional)**

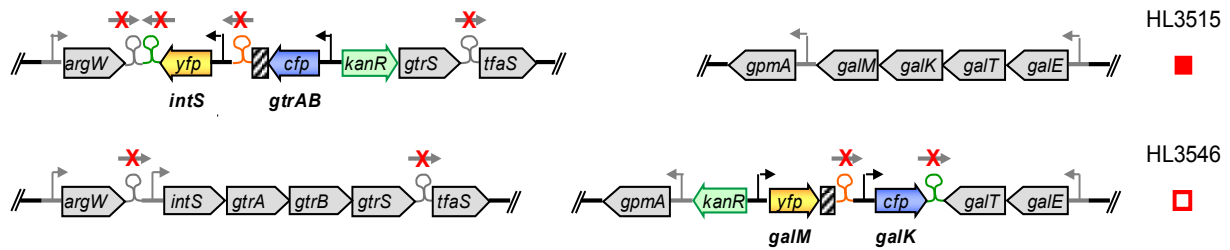

**CLUSTERED (Operon)**

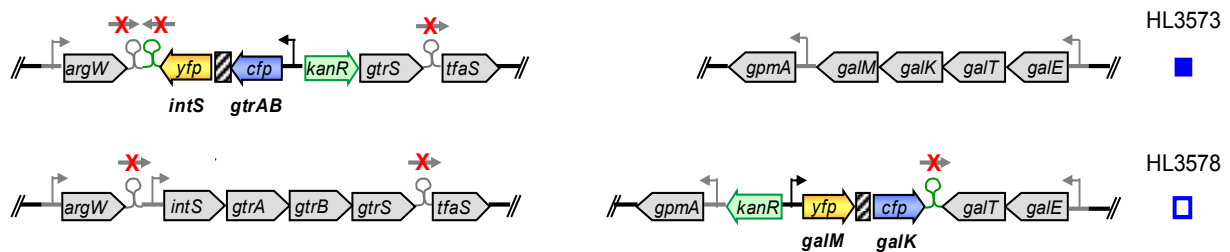

**CLUSTERED (Divergent)**

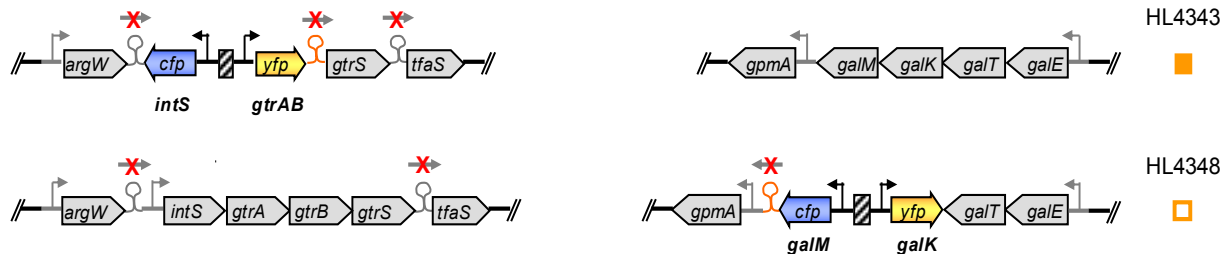

**Figure S1** Details of the non-clustered and clustered gene arrangements shown in **Figure 1A**.

**LEGEND**

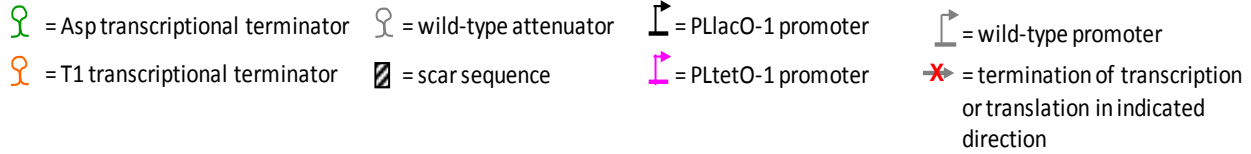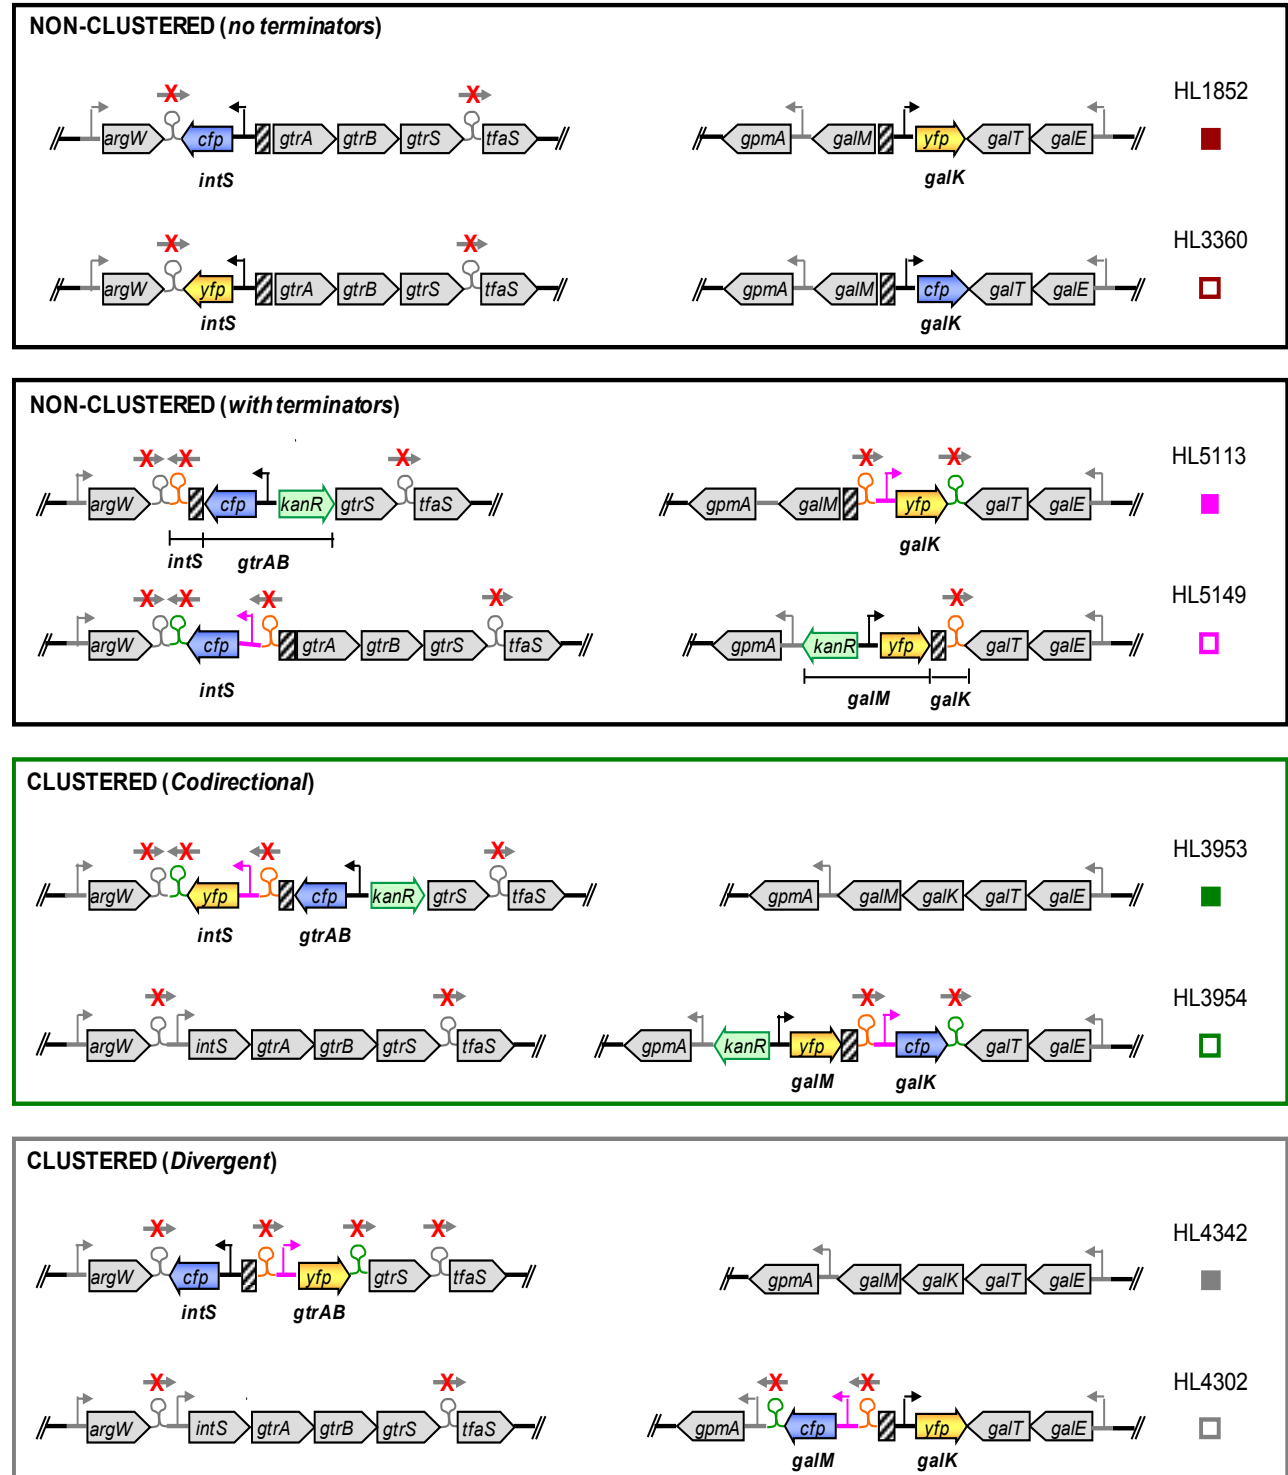

**Figure S2** Details of the non-clustered and clustered gene arrangements shown in **Figure 3A** and non-clustered genes without terminators (filled and unfilled maroon symbols).

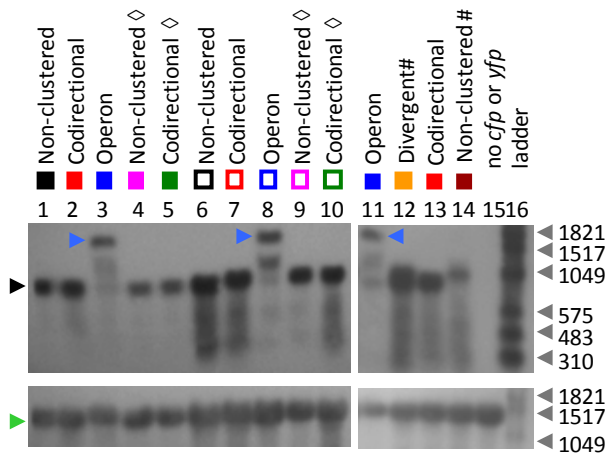

**Figure S3** RNA measurements by Northern blotting. Error bars indicate the s.e.m. of duplicate measurements. Symbols indicate the gene arrangements in **Figure 1A** and **Figure 3A**. Representative Northern blot showing hybridization of a *cfp* probe which binds both *cfp* and *yfp* mRNAs (upper) and a 16S RNA probe (lower). Measurements were performed on duplicate sets of samples. # indicates at least one of the mRNA transcripts does not have a terminator. The maroon symbol represents a non-clustered gene arrangement where *cfp* at *intS* and *yfp* at *galK* do not have terminators (HL1852). Blue arrowheads indicate the full length mRNA for operons. Black arrowhead indicates the single gene mRNA.  $\diamond$  indicates one of the promoters is PLtetO-1. The green arrowhead indicates the 16S RNA. The grey arrowheads indicate mRNAs in the size ladder. Contrast and brightness were adjusted solely to enhance visualization of the printed figure; no bands were obscured or selectively enhanced.

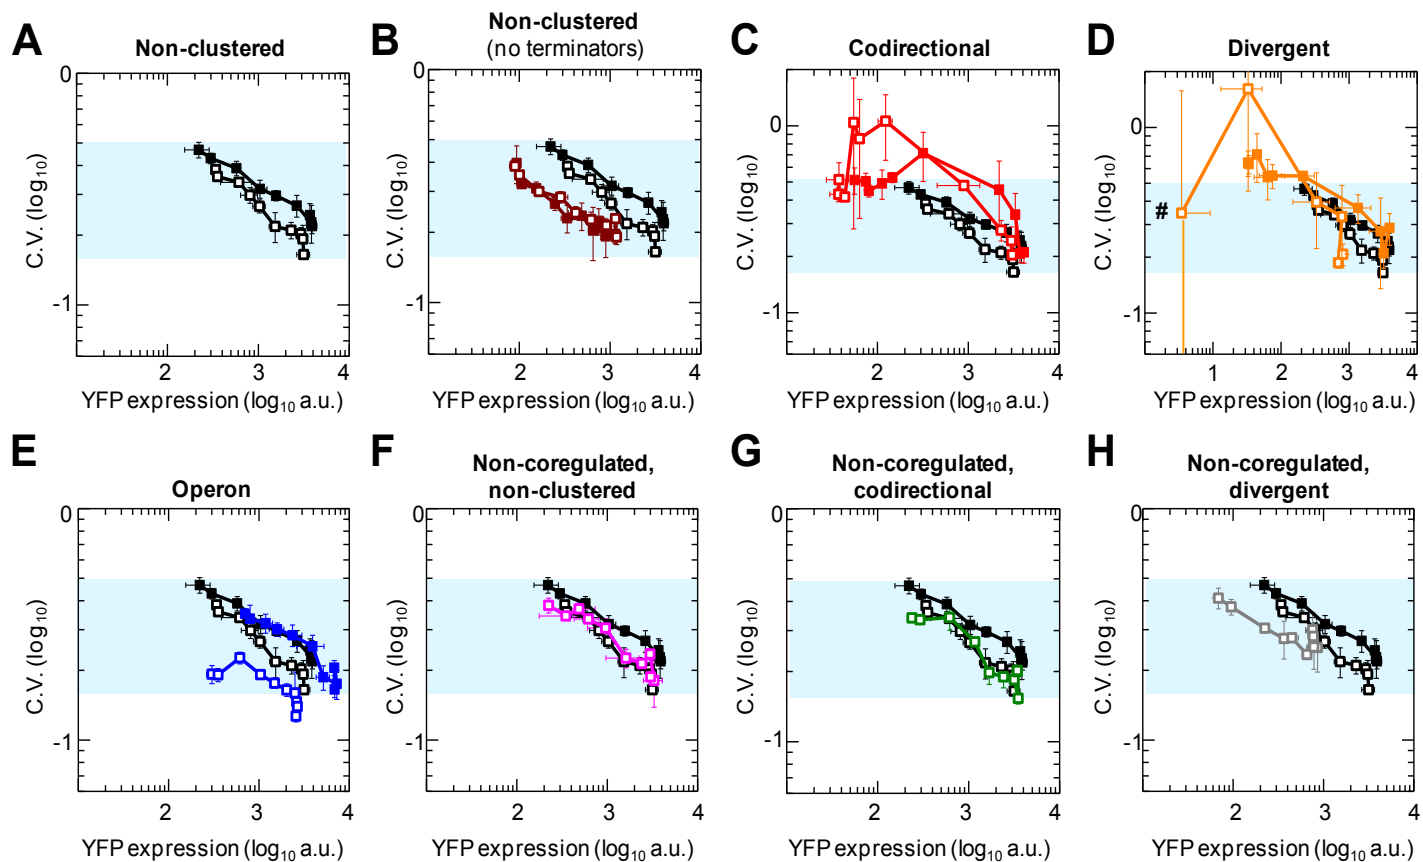

**Figure S4** Gene expression noise for YFP in clustered and non-clustered gene arrangements. **(A-H)** Each panel shows the coefficient of variation (C.V.) for a different gene arrangement. Data symbols indicate the gene arrangements shown in **Figure 1A** and **Figure 3A**. In addition we include non-clustered genes without terminators (maroon symbols, **panel B**). All cells are included in the analysis. Error bars indicate the s.e.m. (number of replicates is stated in the legends of **Figures 1** and **3**). The non-clustered gene arrangement with terminators (and the blue shading which indicates the range of the C.V. in this arrangement) serves as a reference in all plots. # HL4348 had YFP expression values less than zero after background autofluorescence subtraction at 0, 1, 5 and 10  $\mu$ M IPTG; these values are therefore not shown on the plot.

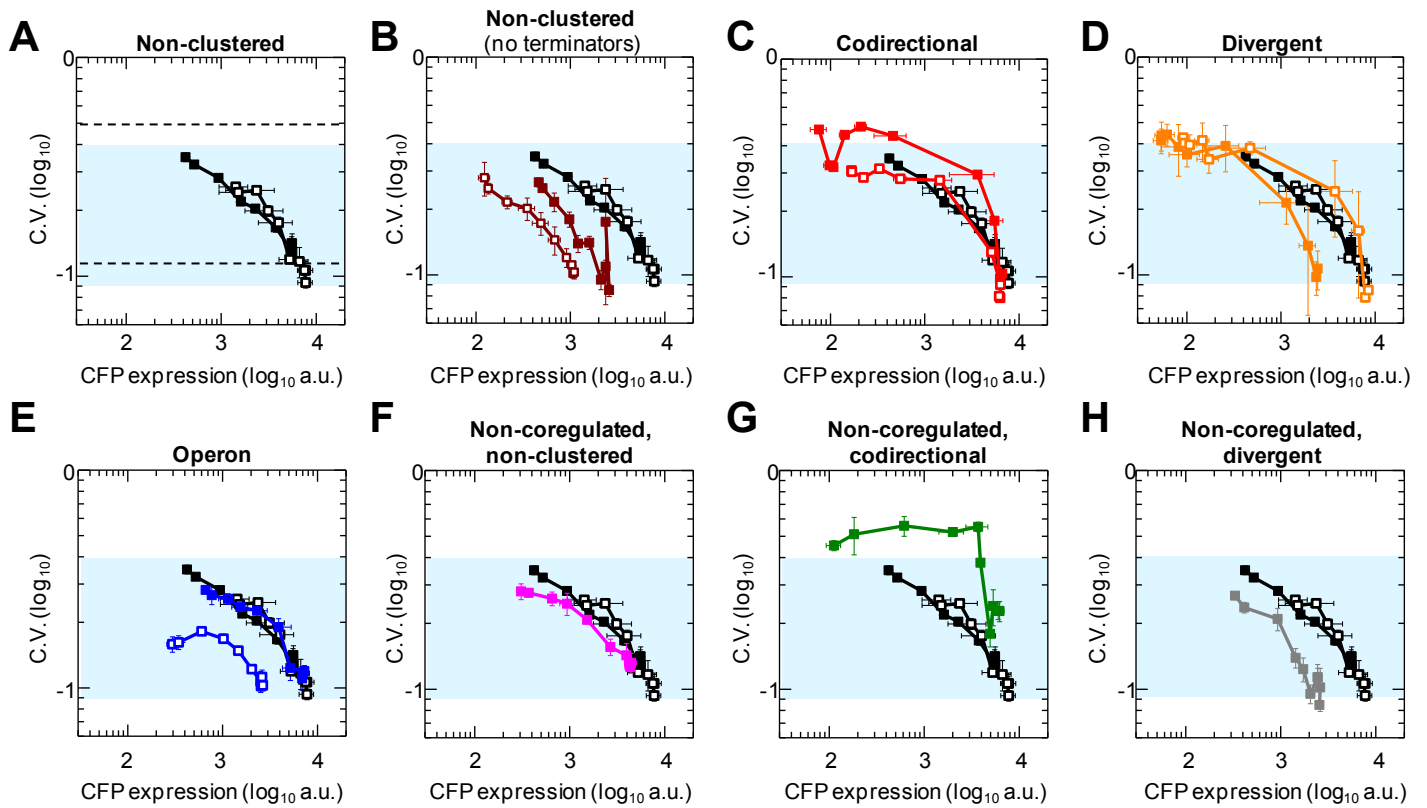

**Figure S5** Gene expression noise for CFP in clustered and non-clustered gene arrangements with only cells with expression within 2 S.D. of the mean included in the analysis. **(A-H)** Each panel shows the coefficient of variation (C.V.) for a different gene arrangement. Data symbols indicate the gene arrangements shown in **Figures 1A** and **3A**. In addition we include non-clustered genes without terminators (maroon symbols, **panel B**). Error bars indicate the s.e.m. (number of replicates is stated in the legends of **Figures 1** and **3**). The non-clustered gene arrangement with terminators serves as a reference in all plots (blue shading indicates the range of the C.V. for this arrangement). Black dash lines indicate the upper and lower bounds of the C.V. in non-clustered gene arrangements from **Figure 4A**.

**A**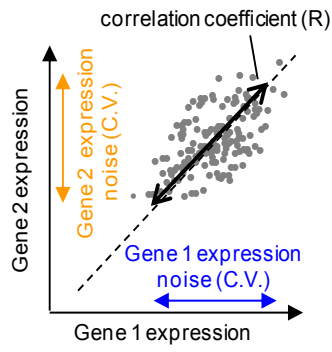**B**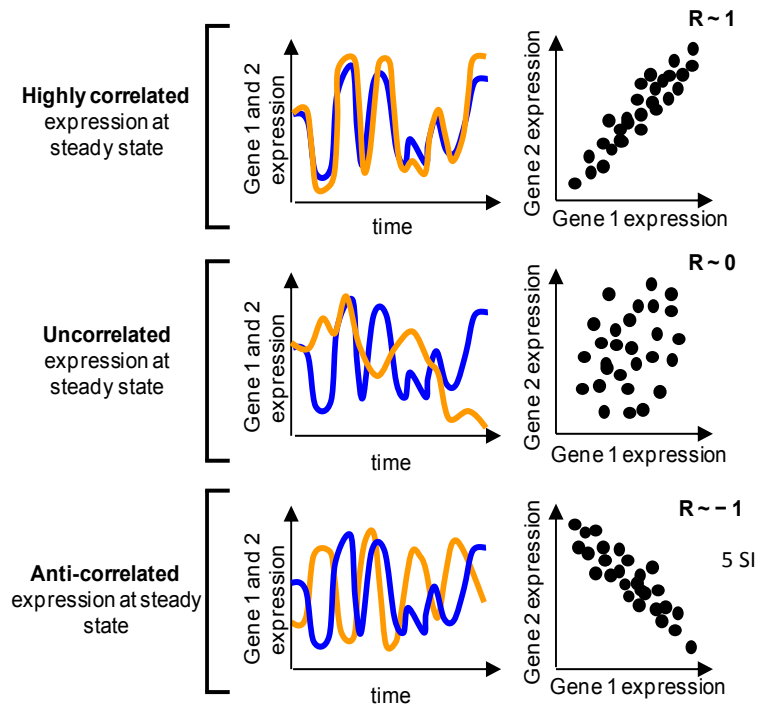

**Figure S6** Description of the correlation coefficient. **(A)** Scatter plot of Gene 1 and Gene 2 expression showing the noise and the correlation coefficient ( $R$ ). **(B)** Diagrams showing the steady state expression of Gene 1 (blue lines) and Gene 2 (gold lines) as a function of time and a corresponding scatter plot for highly correlated expression (top), uncorrelated expression (middle) and anti-correlated expression (bottom).

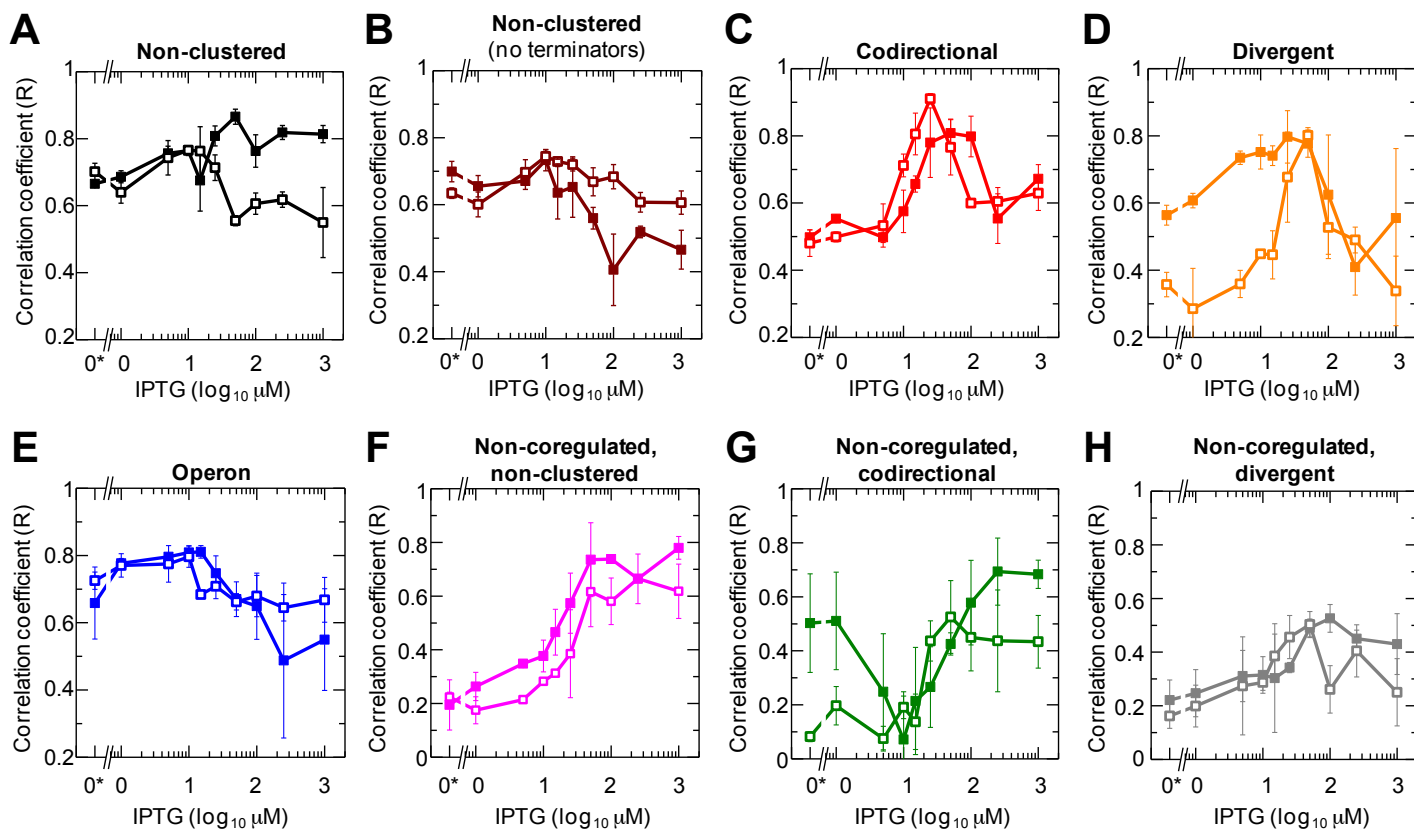

**Figure S7** Correlation coefficient ( $R$ ) as a function of the IPTG concentration for clustered and non-clustered gene arrangements with only cells within 2 S.D. of the mean included in the analysis. (A-H) Each panel shows the correlation coefficient for a different gene arrangement. Data symbols indicate the gene arrangements shown in **Figures 1A** and **3A**. In addition we include non-clustered genes without terminators (maroon symbols, **panel B**). Error bars indicate the s.e.m. (number of replicates is stated in the legends of **Figures 1** and **3**). 0\* indicates an actual value of zero not  $10^0$ .

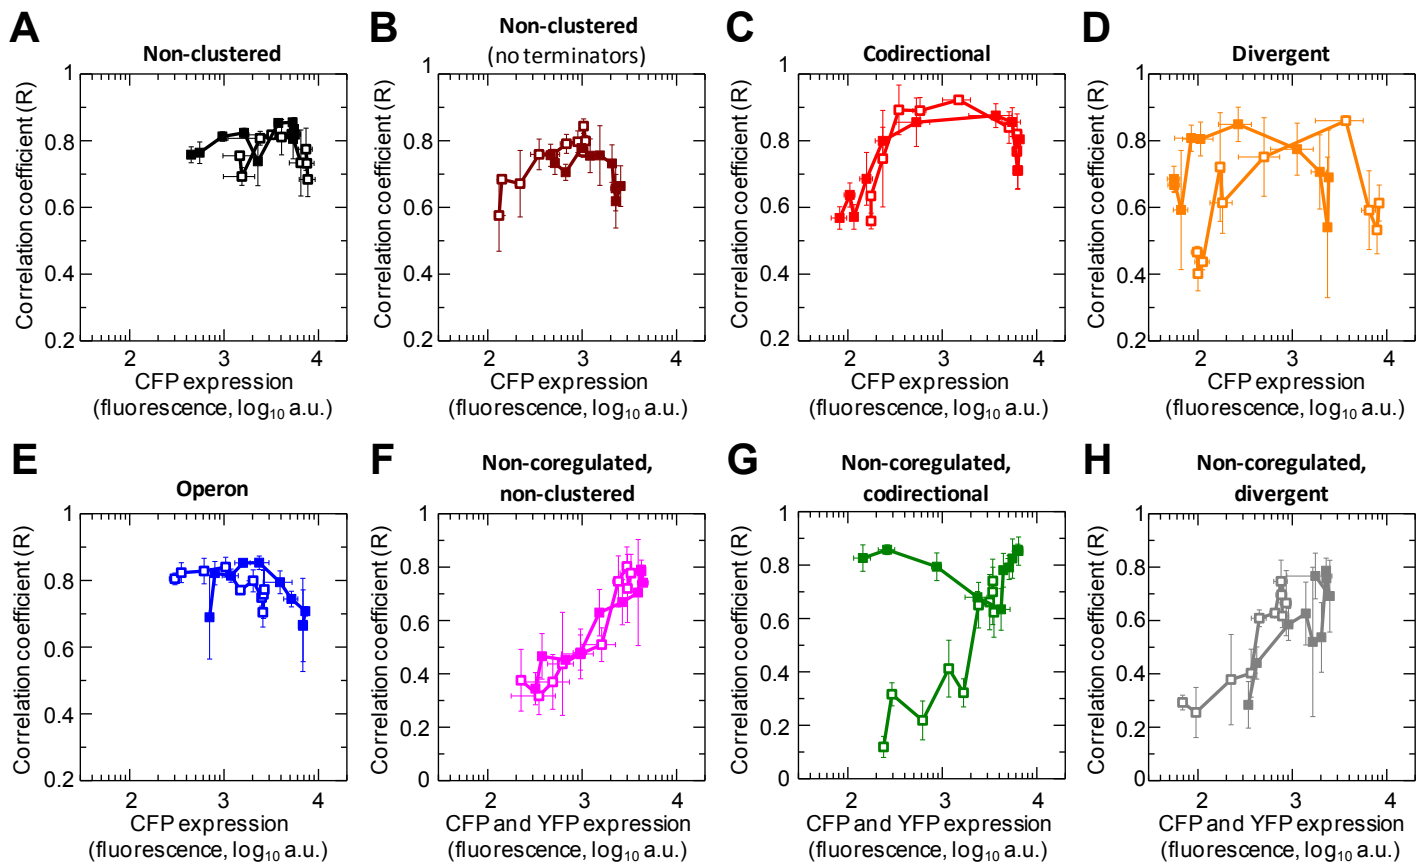

**Figure S8** Correlation coefficient as a function of mean expression for clustered and non-clustered gene arrangements. (A-H) Each panel shows the correlation coefficient for a different gene arrangement. Data symbols indicate the gene arrangements shown in **Figures 1A** and **3A**. In addition we include non-clustered genes without terminators (maroon symbols, **panel B**). All cells are included in the analysis. Error bars indicate the s.e.m. (number of replicates is stated in the legends of **Figures 1A** and **3A**).



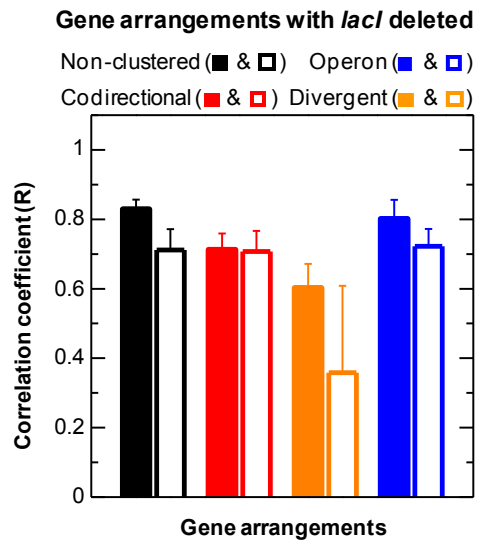

**Figure S9** Correlation coefficient (R) for different gene arrangements calculated without outliers (cells more than 2 S.D. from the mean). Data symbols indicate the gene arrangements shown in **Figure 1A**. Error bars indicate the s.e.m. of 5-7 replicate measurements.

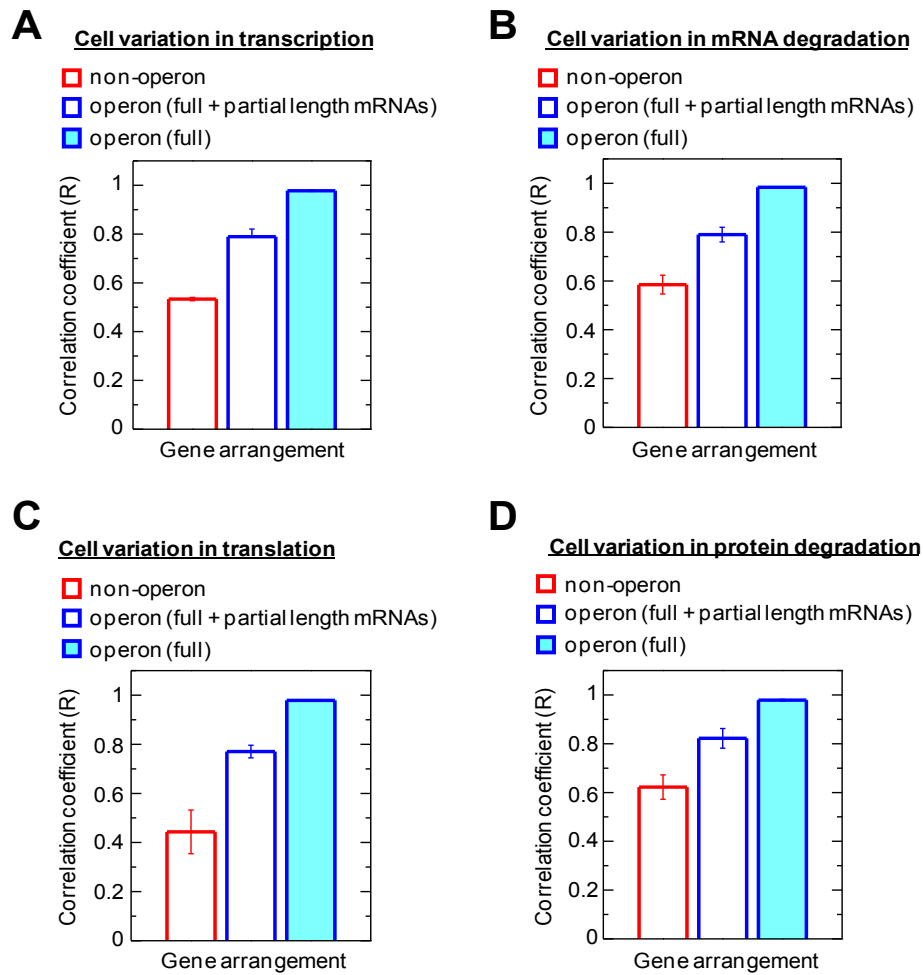

**Figure S10** Correlation coefficients generated by stochastic simulations that include fluctuations in global factors. Cell-to-cell variation in global factors such as the concentrations and activity of RNA polymerases, RNA degradosomes and ribosomes, and growth rates are included in the stochastic simulations. Variation in these global factors effectively alters the rate constants for transcription, mRNA degradation, translation, and protein clearance (see **Materials and Methods**). Error bars indicate s.e.m. of quintuplicate simulations. Results in **panels A-D** should be compared to **Figure 7B** (stochastic simulation without any variation in global factors). **(A)** Cell variation in the transcription rate ( $k_m$ ) from 0.15 to 0.45 mRNA/min. **(B)** Cell variation in the mRNA degradation rate constant ( $k_{-m}$ ) from 0.075 to 0.225 per min. **(C)** Cell variation in the translation rate ( $k_p$ ) from 2 to 6 proteins/mRNA/min. **(D)** Cell variation in the protein clearance rate ( $k_d$ ) from 0.015 to 0.045 per min.

**Table S1 Strains**

| Strain  | Description                                                                                  | <i>cfp</i><br>position | <i>yfp</i><br>position | Structure                                                            |
|---------|----------------------------------------------------------------------------------------------|------------------------|------------------------|----------------------------------------------------------------------|
| MG1655  | Yale <i>E. coli</i> genetic stock center (CGSC#7740)                                         | N/A                    | N/A                    | N/A                                                                  |
| HL716*  | MG1655 + <i>lacIq</i> at <i>intS</i> site                                                    | N/A                    | N/A                    | N/A                                                                  |
| HL1745§ | MG1655 + PLlacO-1::T710:: <i>cfp</i> at <i>intS</i>                                          | <i>intS</i>            | N/A                    | Single color                                                         |
| HL1852§ | HL1745 + PLlacO-1::T710:: <i>yfp</i> at <i>galk</i>                                          | <i>intS</i>            | <i>galk</i>            | Non-clustered                                                        |
| HL1951§ | MG1655 + PLlacO-1::T710:: <i>yfp</i> at <i>galk</i>                                          | N/A                    | <i>galk</i>            | Single color                                                         |
| HL2028* | HL1852 + $\Delta$ <i>lacI</i>                                                                | <i>intS</i>            | <i>galk</i>            | Non-clustered                                                        |
| HL2960  | MG1655 + PLlacO-1::T710:: <i>cfp</i> at <i>galk</i>                                          | N/A                    | <i>galk</i>            | Single color                                                         |
| HL3355* | MG1655 + KanR::PLlacO-1::T710:: <i>cfp</i> at <i>gtrAB</i>                                   | <i>gtrAB</i>           | N/A                    | Single color                                                         |
| HL3360  | HL2960 + PLlacO-1::T710:: <i>yfp</i> at <i>intS</i>                                          | <i>galk</i>            | <i>intS</i>            | Non-clustered                                                        |
| HL3368* | MG1655 + KanR::PLlacO-1::T710:: <i>yfp</i> at <i>galM</i>                                    | N/A                    | <i>galM</i>            | Single color                                                         |
| HL3515* | HL3355 + T1 terminator::PLlacO-1::T710:: <i>yfp</i> ::Asp terminator at <i>intS</i>          | <i>gtrAB</i>           | <i>intS</i>            | Codirectional: <i>cfp</i> upstream of <i>yfp</i>                     |
| HL3546* | HL3368 + T1 terminator::PLlacO-1::T710:: <i>cfp</i> ::Asp terminator at <i>galk</i>          | <i>galk</i>            | <i>galM</i>            | Codirectional: <i>yfp</i> upstream of <i>cfp</i>                     |
| HL3573  | HL3515 + ( $\Delta$ T1 terminator::PLlacO-1)                                                 | <i>gtrAB</i>           | <i>intS</i>            | Operon: <i>cfp</i> upstream of <i>yfp</i>                            |
| HL3578  | HL3546 + ( $\Delta$ T1 terminator::PLlacO-1)                                                 | <i>galk</i>            | <i>galM</i>            | Operon: <i>yfp</i> upstream of <i>cfp</i>                            |
| HL3640  | HL3515 + $\Delta$ <i>lacI</i>                                                                | <i>gtrAB</i>           | <i>intS</i>            | Codirectional: <i>cfp</i> upstream of <i>yfp</i>                     |
| HL3641  | HL3546 + $\Delta$ <i>lacI</i>                                                                | <i>galk</i>            | <i>galM</i>            | Codirectional: <i>yfp</i> upstream of <i>cfp</i>                     |
| HL3642  | HL3573 + $\Delta$ <i>lacI</i>                                                                | <i>gtrAB</i>           | <i>intS</i>            | Operon: <i>cfp</i> upstream of <i>yfp</i>                            |
| HL3643  | HL3578 + $\Delta$ <i>lacI</i>                                                                | <i>galk</i>            | <i>galM</i>            | Operon: <i>yfp</i> upstream of <i>cfp</i>                            |
| HL3953  | HL3355 + T1 terminator::PLtetO-1::T710:: <i>yfp</i> ::Asp terminator at <i>intS</i>          | <i>gtrAB</i>           | <i>intS</i>            | Non-coregulated,<br>codirectional: <i>cfp</i> upstream of <i>yfp</i> |
| HL3954  | HL3368 + T1 terminator::PLtetO-1::T710:: <i>cfp</i> ::Asp terminator at <i>galk</i>          | <i>galk</i>            | <i>galM</i>            | Non-coregulated,<br>codirectional: <i>yfp</i> upstream of <i>cfp</i> |
| HL4302  | HL1951 + T1 terminator::PLtetO-1::T710:: <i>cfp</i> ::Asp terminator inserted at <i>galM</i> | <i>galM</i>            | <i>galk</i>            | Non-coregulated, divergent                                           |

Previously reported strains in Lim *et al.* 2011 (\*) and Block *et al.* 2012 (§).

Table S1 continued Strains

| Strain | Description                                                                          | <i>cfp</i><br>position | <i>yfp</i><br>position | Structure                      |
|--------|--------------------------------------------------------------------------------------|------------------------|------------------------|--------------------------------|
| HL4342 | HL1745 + T1 terminator::PLtetO-1::T710::yfp::Asp terminator inserted at <i>gtrAB</i> | <i>intS</i>            | <i>gtrAB</i>           | Non-coregulated, divergent     |
| HL4343 | HL1745 + PLlacO-1::T710::yfp::T7 terminator::T1 terminator inserted at <i>gtrAB</i>  | <i>intS</i>            | <i>gtrAB</i>           | Divergent                      |
| HL4348 | HL1951 + PLlacO-1::T710::cfp::T7 terminator::T1 terminator inserted at <i>galM</i>   | <i>galM</i>            | <i>galK</i>            | Divergent                      |
| HL5056 | HL3355 + T1 terminator at <i>intS</i>                                                | <i>gtrAB</i>           | N/A                    | Single color                   |
| HL5057 | HL3368 + T1 terminator at <i>galK</i>                                                | N/A                    | <i>galM</i>            | Single color                   |
| HL5086 | HL5056 + T1 terminator::PLlacO-1::T710::yfp::Asp terminator at <i>galK</i>           | <i>gtrAB</i>           | <i>galK</i>            | Non-clustered                  |
| HL5087 | HL5057 + T1 terminator::PLlacO-1::T710::cfp::Asp terminator at <i>intS</i>           | <i>intS</i>            | <i>galM</i>            | Non-clustered                  |
| HL5113 | HL5056 + T1 terminator::PLtetO-1::T710::yfp::Asp terminator at <i>galK</i>           | <i>gtrAB</i>           | <i>galK</i>            | Non-coregulated, non-clustered |
| HL5149 | HL5057 + T1 terminator::PLtetO-1::T710::cfp::Asp terminator at <i>intS</i>           | <i>intS</i>            | <i>galM</i>            | Non-coregulated, non-clustered |
| HL5553 | HL5086 + $\Delta lacI$                                                               | <i>gtrAB</i>           | <i>galK</i>            | Non-clustered                  |
| HL5554 | HL5087 + $\Delta lacI$                                                               | <i>intS</i>            | <i>galM</i>            | Non-clustered                  |
| HL5555 | HL4343 + $\Delta lacI$                                                               | <i>intS</i>            | <i>gtrAB</i>           | Divergent                      |
| HL5556 | HL4348 + $\Delta lacI$                                                               | <i>galM</i>            | <i>galK</i>            | Divergent                      |

**Table S2 Plasmids used as templates for chromosomal integrations**

| Plasmid  | Description                                                                                                                                               |
|----------|-----------------------------------------------------------------------------------------------------------------------------------------------------------|
| pHL471*  | KanR with no FRT sites + PLlacO-1::T710:: <i>cfp</i> ::T7 terminator::T1 terminator + ColE1. Template for PCR amplification for <i>cfp</i> integrations.  |
| pHL538*  | KanR with FRT sites + PLlacO-1::T710:: <i>cfp</i> ::T7 terminator::T1 terminator + ColE1. Template for PCR amplification for <i>cfp</i> integrations.     |
| pHL582*  | KanR with FRT sites + PLlacO-1::T710:: <i>yfp</i> :: T7 terminator::T1 terminator + ColE1. Template for PCR amplification for <i>yfp</i> integrations.    |
| pHL1167* | CamR with FRT sites + T1 terminator::PLlacO-1::T710:: <i>yfp</i> ::Asp terminator + ColE1. Template for PCR amplification for <i>yfp</i> integrations.    |
| pHL1168* | CamR with FRT sites + T1 terminator::PLlacO-1::T710:: <i>cfp</i> ::Asp terminator + ColE1. Template for PCR amplification for <i>cfp</i> integrations.    |
| pHL1181* | KanR with no FRT sites + PLlacO-1::T710:: <i>yfp</i> ::T7 terminator::T1 terminator + ColE1. Template for PCR amplification for <i>yfp</i> integrations   |
| pHL1257  | CamR with FRT sites + T1 terminator:: PLtetO-1::T710:: <i>cfp</i> ::Asp terminator + ColE1. Template for PCR amplification for <i>cfp</i> integrations.   |
| pHL1274  | CamR with FRT sites + T1 terminator:: PLtetO-1::T710:: <i>yfp</i> ::Asp terminator + ColE1. Template for PCR amplification for <i>yfp</i> integrations.   |
| pHL1580  | CamR with FRT sites + T1 terminator + ColE1. Template for PCR amplification for integration of the T1 terminator at the end of <i>cfp</i> or <i>yfp</i> . |

Previously reported plasmids in Lim *et al.*, 2011 (\*).

**Table S3 Oligonucleotides used for chromosomal integrations**

| Oligonucleotide | Description                                                                 | Sequence (5' to 3')                                                              |
|-----------------|-----------------------------------------------------------------------------|----------------------------------------------------------------------------------|
| CYFPendpKD1F*   | integrate a second gene downstream of <i>cfp</i> or <i>yfp</i>              | tcgtgaccgccccgggatcactcacggcatggacgagctgtacaagtaagttg<br>aggctggagctgcttc        |
| CYFPgalKR*      | integrate <i>cfp</i> or <i>yfp</i> with no terminators at <i>galk</i>       | gtttgcgcgagtcagcgatatccattttcgcaatccggagtgaagaattactt<br>gtacagctcgccatgcc       |
| CYFPintCR*      | integrate <i>cfp</i> or <i>yfp</i> with no terminators at <i>intS</i>       | ccgtagatttacagttcgtcatggttcgcttcagatcgttgacagccgactacttg<br>tacagctcgccatgcc     |
| GalkCoIER*      | integrate <i>cfp</i> or <i>yfp</i> with terminators at <i>galk</i>          | gtttgcgcgagtcagcgatatccattttcgcaatccggagtgaagaagctg<br>ataccgctcggcagccgaacg     |
| GalkFRCCYFPR*   | integrate <i>yfp</i> with no terminators at <i>galM</i>                     | cggaagagctggcctgccgtacagcaagctgctgctaacaatatgaattact<br>tgtacagctcgccatgcc       |
| GalMFtermOext*  | integrate <i>yfp</i> at <i>galM</i>                                         | ctggtgatttgaacaatatgagataaagccctcatgacgagggcgtaacaatca<br>acaggagtccaagcagctctcg |
| GtrBFtermOext*  | integrate <i>cfp</i> at <i>gtrAB</i>                                        | tcatttttgactctcttgatgatgatttcggcgctttttggtttcaaatcaacagg<br>agtccaagcagctctcg    |
| IntCCoIER*      | integrate <i>cfp</i> or <i>yfp</i> with terminators at <i>intS</i>          | ccgtagatttacagttcgtcatggttcgcttcagatcgttgacagcccaagctga<br>taccgctcggcagccgaacg  |
| IntCFRCCYFPR*   | integrate <i>cfp</i> with no terminators at <i>gtrAB</i>                    | tggcggactggcttgatgagaaggtggagtgagcgaccttaacaactattact<br>tgtacagctcgccatgcc      |
| PKD1FgalKF*     | integrate <i>cfp</i> or <i>yfp</i> at <i>galk</i>                           | ttcatattgttcagcgacgcttgctgtacggcaggcaccagctcttcgggtgtag<br>gctggagctgcttc        |
| PKD1FintCF*     | integrate <i>cfp</i> or <i>yfp</i> at <i>intS</i>                           | atagttgtaagtgctcactccaccttctcatcaagccagctccgcccagtgtag<br>gctggagctgcttc         |
| RevgalMCoIER    | integrate <i>cfp</i> with terminators at <i>galM</i>                        | ctggtgatttgaacaatatgagataaagccctcatgacgagggcgtaacaagct<br>gataccgctcggcagccgaacg |
| RevgalMpKD1F§   | integrate <i>cfp</i> at <i>galM</i>                                         | ggtattaagagactttttacgtttgtaaacatcacaaggagcaggacagtgta<br>ggctggagctgcttc         |
| RevgtrApKD1F§   | integrate <i>yfp</i> at <i>gtrAB</i>                                        | aagacttggatgatagacttcattcctttgattattagctgatagaagaagtgtag<br>gctggagctgcttc       |
| RevgtrBCoIER    | integrate <i>yfp</i> with terminators at <i>gtrAB</i>                       | tcatttttgactctcttgatgatgatttcggcgctttttggtttcaagctgatac<br>cgctcggcagccgaacg     |
| T710RBSpKD4R    | remove T1 terminator::PLlacO-1 from codirectional genes to create an operon | ctagccatatgtatatctccttcttaaagttaaacaaaattatttctagaattccgg<br>ggatccgctgacc       |

Previously reported oligonucleotides in Lim *et al.*, 2011 (\*) and Block *et al.* 2012 (§).

**Table S4 Maximum and minimum expression levels and parameters obtained from fits to the Hill function**

| Group                            | Fluorescent reporter, construction (strain) ‡                                                     | Max*        | Min*       | $\alpha$   | $\delta$  | K          | n           | Reduced $\chi^2$ (R <sup>2</sup> ) |
|----------------------------------|---------------------------------------------------------------------------------------------------|-------------|------------|------------|-----------|------------|-------------|------------------------------------|
| Non-clustered                    | <b>CFP</b> , PLlacO-1:: <i>cfp</i> at <i>intS</i> & PLlacO-1:: <i>yfp</i> at <i>galk</i> (HL1852) | 2263 ± 253  | 463 ± 16   | 2145 ± 70  | 479 ± 9   | 24.9 ± 2.0 | 1.30 ± 0.09 | 1.34<br>(>0.99)                    |
| Non-clustered                    | <b>YFP</b> , PLlacO-1:: <i>cfp</i> at <i>intS</i> & PLlacO-1:: <i>yfp</i> at <i>galk</i> (HL1852) | 824 ± 213   | 93 ± 10    | 771 ± 87   | 96 ± 8    | 24.8 ± 4.1 | 1.54 ± 0.19 | 0.13<br>(>0.99)                    |
| Non-clustered                    | <b>CFP</b> , PLlacO-1:: <i>cfp</i> at <i>galk</i> & PLlacO-1:: <i>yfp</i> at <i>intS</i> (HL3360) | 1088 ± 19   | 132 ± 14   | 927 ± 47   | 135 ± 7   | 20.1 ± 2.5 | 1.71 ± 0.26 | 0.07<br>(>0.99)                    |
| Non-clustered                    | <b>YFP</b> , PLlacO-1:: <i>cfp</i> at <i>galk</i> & PLlacO-1:: <i>yfp</i> at <i>intS</i> (HL3360) | 1180 ± 84   | 90 ± 12    | 1122 ± 89  | 92 ± 8    | 27.0 ± 3.0 | 1.58 ± 0.14 | 0.09<br>(>0.99)                    |
| Non-clustered                    | <b>CFP</b> , PLlacO-1:: <i>cfp</i> at <i>intS</i> & PLlacO-1:: <i>yfp</i> at <i>galk</i> (HL5086) | 5622 ± 119  | 449 ± 23   | 5175 ± 88  | 524 ± 10  | 19.8 ± 0.5 | 1.91 ± 0.06 | 6.14<br>(>0.99)                    |
| Non-clustered                    | <b>YFP</b> , PLlacO-1:: <i>cfp</i> at <i>intS</i> & PLlacO-1:: <i>yfp</i> at <i>galk</i> (HL5086) | 3901 ± 507  | 221 ± 66   | 3655 ± 86  | 282 ± 9   | 19.2 ± 0.6 | 2.04 ± 0.08 | 3.47<br>(>0.99)                    |
| Non-clustered                    | <b>CFP</b> , PLlacO-1:: <i>cfp</i> at <i>intS</i> & PLlacO-1:: <i>yfp</i> at <i>galk</i> (HL5087) | 7721 ± 1482 | 1470 ± 499 | 6285 ± 292 | 1464 ± 27 | 18.1 ± 2.3 | 1.39 ± 0.12 | 0.19<br>(>0.99)                    |
| Non-clustered                    | <b>YFP</b> , PLlacO-1:: <i>cfp</i> at <i>intS</i> & PLlacO-1:: <i>yfp</i> at <i>galk</i> (HL5087) | 3161 ± 512  | 340 ± 16   | 2975 ± 322 | 341 ± 15  | 31.7 ± 7.2 | 1.53 ± 0.32 | 0.10<br>(>0.99)                    |
| Non-coregulated, non-clustered # | <b>CFP</b> , PLlacO-1:: <i>cfp</i> at <i>intS</i> & PLtetO-1:: <i>yfp</i> at <i>galk</i> (HL5113) | 4258 ± 223  | 320 ± 10   | 4075 ± 273 | 330 ± 26  | 19.9 ± 3.2 | 1.80 ± 0.27 | 0.25<br>(>0.99)                    |
| Non-coregulated, non-clustered # | <b>YFP</b> , PLlacO-1:: <i>yfp</i> at <i>galk</i> & PLtetO-1:: <i>cfp</i> at <i>intS</i> (HL5149) | 3028 ± 230  | 225 ± 22   | 3165 ± 321 | 237 ± 15  | 31.0 ± 6.7 | 1.51 ± 0.30 | 1.11<br>(0.99)                     |
| Operon (1 <sup>st</sup> gene)    | <b>CFP</b> , PLlacO-1:: <i>cfp-yfp</i> at <i>intS</i> (HL3573)                                    | 6881 ± 94   | 701 ± 56   | 6320 ± 300 | 713 ± 27  | 25.8 ± 3.0 | 1.51 ± 0.14 | 0.76<br>(>0.99)                    |
| Operon (1 <sup>st</sup> gene)    | <b>YFP</b> , PLlacO-1:: <i>yfp-cfp</i> at <i>galk</i> (HL3578)                                    | 2913 ± 241  | 120 ± 15   | 2847 ± 212 | 123 ± 15  | 17.6 ± 2.7 | 1.67 ± 0.36 | 0.13<br>(>0.99)                    |

\*Actual values obtained at 0 and 1 mM IPTG as opposed to fit values. ‡ *lacI* is in the native position in all strains. # Hill function was fitted only to the gene under the control of PLlacO-1.

**Table S4 continued Maximum and minimum expression levels and parameters obtained from fits to the Hill function**

| Group                                | Fluorescent reporter, construction (strain) ‡                                                                         | Max*       | Min*     | $\alpha$   | $\delta$ | K           | n           | Reduced $\chi^2$ (R <sup>2</sup> ) |
|--------------------------------------|-----------------------------------------------------------------------------------------------------------------------|------------|----------|------------|----------|-------------|-------------|------------------------------------|
| Operon (2 <sup>nd</sup> gene)        | <b>CFP</b> , P <sub>LlacO-1</sub> :: <i>yfp-cfp</i> at <i>galk</i> (HL3578)                                           | 2671 ± 198 | 302 ± 39 | 2395 ± 260 | 308 ± 27 | 14.6 ± 4.2  | 1.75 ± 0.44 | 0.06 (>0.99)                       |
| Operon (2 <sup>nd</sup> gene)        | <b>YFP</b> , P <sub>LlacO-1</sub> :: <i>cfp-yfp</i> at <i>intS</i> (HL3573)                                           | 995 ± 48   | 162 ± 7  | 1080 ± 232 | 165 ± 15 | 29.1 ± 12.0 | 2.16 ± 1.26 | 0.19 (0.98)                        |
| Codirectional (1 <sup>st</sup> gene) | <b>CFP</b> , P <sub>LlacO-1</sub> :: <i>cfp</i> ::T1 term::P <sub>LlacO-1</sub> :: <i>yfp</i> at <i>intS</i> (HL3515) | 6621 ± 326 | 82 ± 15  | 5934 ± 219 | 85 ± 15  | 45.4 ± 2.3  | 3.59 ± 0.54 | 0.74 (>0.99)                       |
| Codirectional (1 <sup>st</sup> gene) | <b>YFP</b> , P <sub>LlacO-1</sub> :: <i>yfp</i> ::T1 term::P <sub>LlacO-1</sub> :: <i>cfp</i> at <i>galk</i> (HL3546) | 2913 ± 241 | 38 ± 6   | 3171 ± 176 | 39 ± 15  | 36.3 ± 3.3  | 4.06 ± 0.92 | 0.03 (>0.99)                       |
| Codirectional (2 <sup>nd</sup> gene) | <b>CFP</b> , P <sub>LlacO-1</sub> :: <i>yfp</i> ::T1 term::P <sub>LlacO-1</sub> :: <i>cfp</i> at <i>galk</i> (HL3546) | 6169 ± 222 | 177 ± 14 | 6034 ± 271 | 180 ± 25 | 34.4 ± 2.2  | 3.97 ± 0.64 | 0.07 (>0.99)                       |
| Codirectional (2 <sup>nd</sup> gene) | <b>YFP</b> , P <sub>LlacO-1</sub> :: <i>cfp</i> ::T1 term::P <sub>LlacO-1</sub> :: <i>yfp</i> at <i>intS</i> (HL3515) | 3138 ± 244 | 56 ± 0   | 3864 ± 60  | 60 ± 6   | 47.3 ± 0.6  | 3.53 ± 0.27 | 4.35 (>0.99)                       |
| Non-coregulated, codirectional#      | <b>CFP</b> , P <sub>LlacO-1</sub> :: <i>cfp</i> ::T1 term::P <sub>LtetO-1</sub> :: <i>yfp</i> at <i>intS</i> (HL3953) | 6298 ± 326 | 144 ± 29 | 5995 ± 271 | 154 ± 27 | 15.9 ± 1.9  | 1.63 ± 0.16 | 0.83 (>0.99)                       |
| Non-coregulated, codirectional#      | <b>YFP</b> , P <sub>LlacO-1</sub> :: <i>yfp</i> ::T1 term::P <sub>LtetO-1</sub> :: <i>cfp</i> at <i>galk</i> (HL3954) | 3425 ± 119 | 239 ± 20 | 3397 ± 213 | 242 ± 15 | 17.7 ± 2.3  | 1.67 ± 0.30 | 0.15 (>0.99)                       |
| Divergent                            | <b>CFP</b> , P <sub>LlacO-1</sub> :: <i>cfp</i> & P <sub>LlacO-1</sub> :: <i>yfp</i> at <i>intS</i> (HL4343)          | 2429 ± 76  | 56 ± 8   | 2366 ± 62  | 62 ± 3   | 61.0 ± 3.5  | 2.64 ± 0.12 | 1.95 (>0.99)                       |
| Divergent                            | <b>YFP</b> , P <sub>LlacO-1</sub> :: <i>cfp</i> & P <sub>LlacO-1</sub> :: <i>yfp</i> at <i>intS</i> (HL4343)          | 3934 ± 58  | 34 ± 4   | 3385 ± 60  | 46 ± 2   | 61.7 ± 2.4  | 3.11 ± 0.12 | 9.20 (0.99)                        |
| Divergent                            | <b>CFP</b> , P <sub>LlacO-1</sub> :: <i>cfp</i> & P <sub>LlacO-1</sub> :: <i>yfp</i> at <i>galk</i> (HL4348)          | 8316 ± 633 | 98 ± 13  | 7973 ± 61  | 127 ± 2  | 64.0 ± 1.0  | 3.04 ± 0.05 | 39.73 (0.99)                       |
| Divergent                            | <b>YFP</b> , P <sub>LlacO-1</sub> :: <i>cfp</i> & P <sub>LlacO-1</sub> :: <i>yfp</i> at <i>galk</i> (HL4348)          | 811 ± 126  | -4 ± 5   | 750 ± 49   | 5.0 ± 2  | 48.9 ± 9.1  | 4.47 ± 1.25 | 0.73 (0.99)                        |
| Non-coregulated, divergent#          | <b>CFP</b> , P <sub>LlacO-1</sub> :: <i>cfp</i> & P <sub>LtetO-1</sub> :: <i>yfp</i> at <i>intS</i> (HL4342)          | 1751 ± 876 | 342 ± 17 | 2027 ± 35  | 341 ± 4  | 9.6 ± 0.2   | 1.42 ± 0.03 | 10.52 (>0.99)                      |
| Non-coregulated, divergent#          | <b>YFP</b> , P <sub>LlacO-1</sub> :: <i>yfp</i> & P <sub>LtetO-1</sub> :: <i>cfp</i> at <i>galk</i> (HL4302)          | 786 ± 132  | 69 ± 7   | 797 ± 50   | 69 ± 4   | 15.3 ± 1.4  | 1.24 ± 0.07 | 3.83 (>0.99)                       |

\*Actual values obtained at 0 and 1 mM IPTG as opposed to fit values. ‡ *lacI* is in the native position in all strains. # Hill function was fitted only to the gene under the control of P<sub>LlacO-1</sub>.
