# Supplementary material
Source: PubMed Central journal article supplement (PMC3567736)
Supplement: 9513dd363bdf85f2bb81afdf0861a5c9_genetics.112.147199-14.pdf [file 9513dd363bdf85f2bb81afdf0861a5c9_genetics.112.147199-14.pdf]

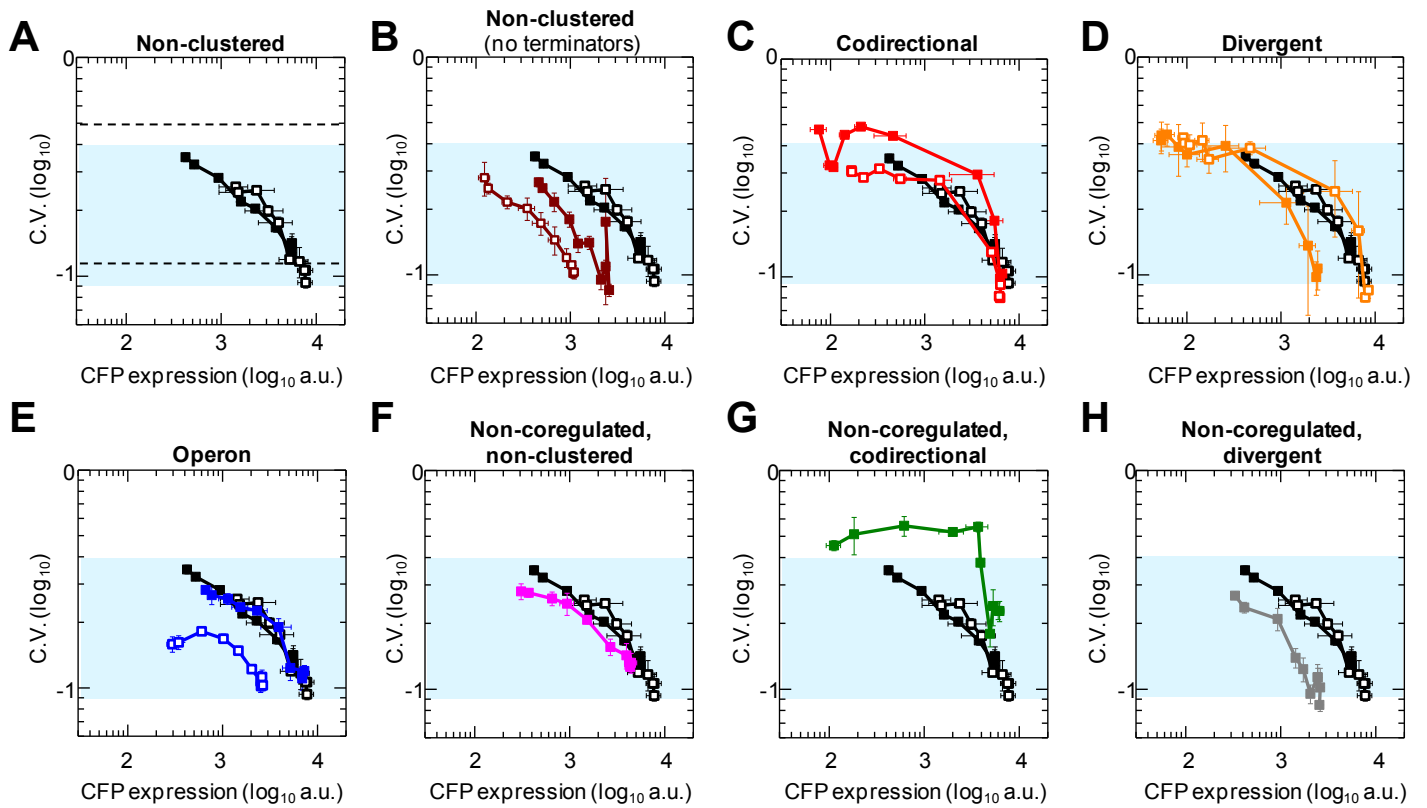

**Figure S5** Gene expression noise for CFP in clustered and non-clustered gene arrangements with only cells with expression within 2 S.D. of the mean included in the analysis. (A-H) Each panel shows the coefficient of variation (C.V.) for a different gene arrangement. Data symbols indicate the gene arrangements shown in **Figures 1A** and **3A**. In addition we include non-clustered genes without terminators (maroon symbols, **panel B**). Error bars indicate the s.e.m. (number of replicates is stated in the legends of **Figures 1** and **3**). The non-clustered gene arrangement with terminators serves as a reference in all plots (blue shading indicates the range of the C.V. for this arrangement). Black dash lines indicate the upper and lower bounds of the C.V. in non-clustered gene arrangements from **Figure 4A**.
