# Supplementary material
Source: PubMed Central journal article supplement (PMC3567736)
Supplement: 422720f649b32931ab30191553cd2e30_genetics.112.147199-15.pdf [file 422720f649b32931ab30191553cd2e30_genetics.112.147199-15.pdf]

**Table S2 Plasmids used as templates for chromosomal integrations**

| Plasmid  | Description                                                                                                                                               |
|----------|-----------------------------------------------------------------------------------------------------------------------------------------------------------|
| pHL471*  | KanR with no FRT sites + pLlacO-1::T710:: <i>cfp</i> ::T7 terminator::T1 terminator + ColE1. Template for PCR amplification for <i>cfp</i> integrations.  |
| pHL538*  | KanR with FRT sites + pLlacO-1::T710:: <i>cfp</i> ::T7 terminator::T1 terminator + ColE1. Template for PCR amplification for <i>cfp</i> integrations.     |
| pHL582*  | KanR with FRT sites + pLlacO-1::T710:: <i>yfp</i> ::T7 terminator::T1 terminator + ColE1. Template for PCR amplification for <i>yfp</i> integrations.     |
| pHL1167* | CamR with FRT sites + T1 terminator::pLlacO-1::T710:: <i>yfp</i> ::Asp terminator + ColE1. Template for PCR amplification for <i>yfp</i> integrations.    |
| pHL1168* | CamR with FRT sites + T1 terminator::pLlacO-1::T710:: <i>cfp</i> ::Asp terminator + ColE1. Template for PCR amplification for <i>cfp</i> integrations.    |
| pHL1181* | KanR with no FRT sites + pLlacO-1::T710:: <i>yfp</i> ::T7 terminator::T1 terminator + ColE1. Template for PCR amplification for <i>yfp</i> integrations   |
| pHL1257  | CamR with FRT sites + T1 terminator:: pLtetO-1::T710:: <i>cfp</i> ::Asp terminator + ColE1. Template for PCR amplification for <i>cfp</i> integrations.   |
| pHL1274  | CamR with FRT sites + T1 terminator:: pLtetO-1::T710:: <i>yfp</i> ::Asp terminator + ColE1. Template for PCR amplification for <i>yfp</i> integrations.   |
| pHL1580  | CamR with FRT sites + T1 terminator + ColE1. Template for PCR amplification for integration of the T1 terminator at the end of <i>cfp</i> or <i>yfp</i> . |

Previously reported plasmids in Lim *et al.*, 2011 (\*).
