# Supplementary material
Source: PubMed Central journal article supplement (PMC3567736)
Supplement: 1368169e65211397f5173e7c8a4c808d_genetics.112.147199-10.pdf [file 1368169e65211397f5173e7c8a4c808d_genetics.112.147199-10.pdf]

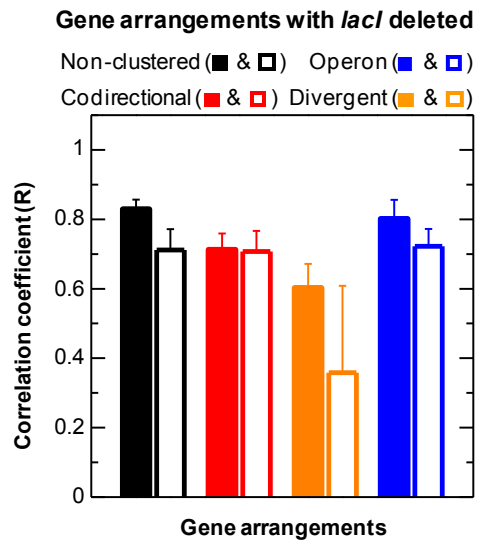

**Figure S9** Correlation coefficient (R) for different gene arrangements calculated without outliers (cells more than 2 S.D. from the mean). Data symbols indicate the gene arrangements shown in **Figure 1A**. Error bars indicate the s.e.m. of 5-7 replicate measurements.
