# Supplementary material
Source: PubMed Central journal article supplement (PMC3567736)
Supplement: 67554930daf2c9d951fdc72bd0f00396_genetics.112.147199-7.pdf [file 67554930daf2c9d951fdc72bd0f00396_genetics.112.147199-7.pdf]

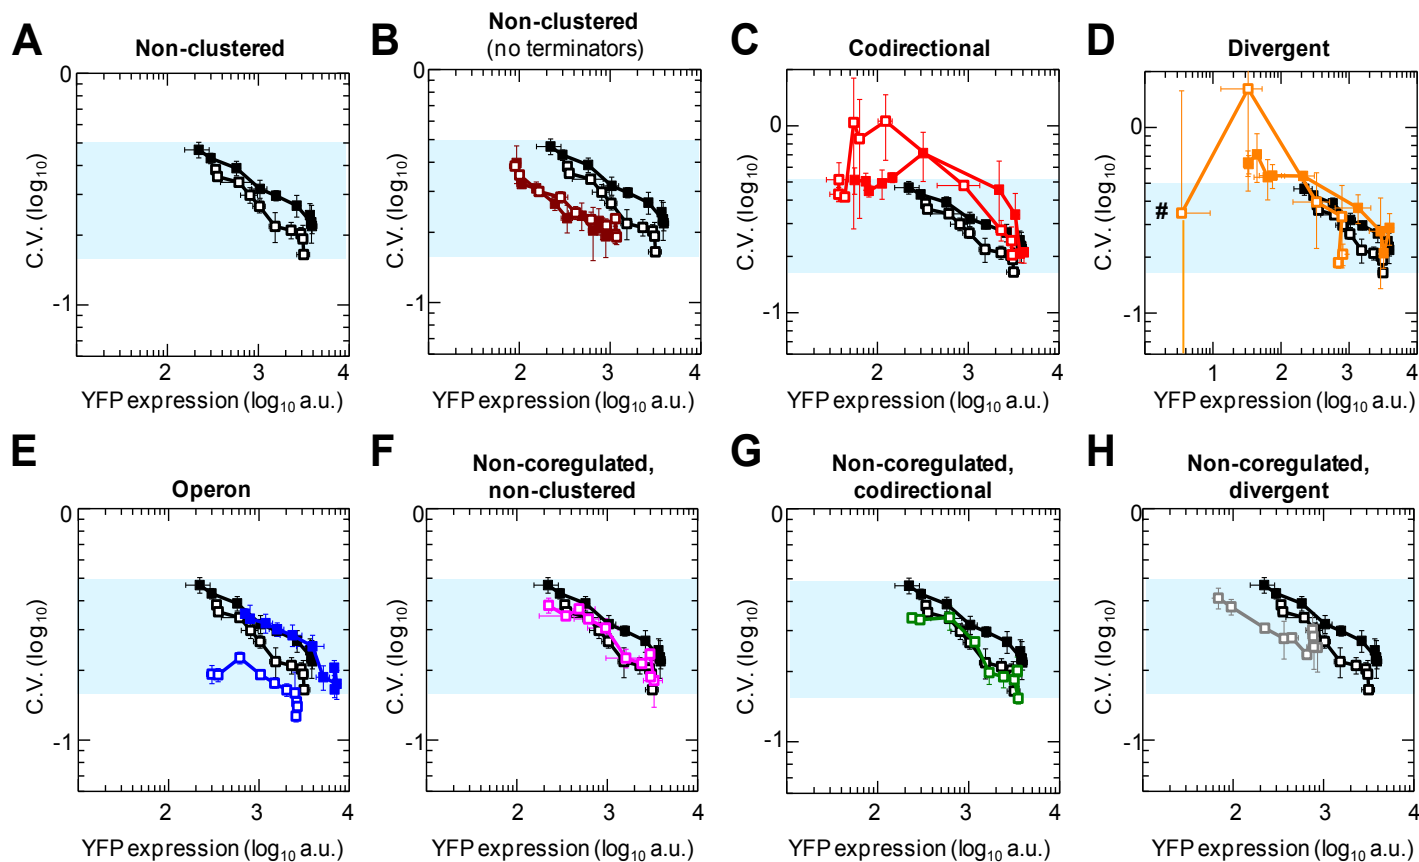

**Figure S4** Gene expression noise for YFP in clustered and non-clustered gene arrangements. **(A-H)** Each panel shows the coefficient of variation (C.V.) for a different gene arrangement. Data symbols indicate the gene arrangements shown in **Figure 1A** and **Figure 3A**. In addition we include non-clustered genes without terminators (maroon symbols, **panel B**). All cells are included in the analysis. Error bars indicate the s.e.m. (number of replicates is stated in the legends of **Figures 1** and **3**). The non-clustered gene arrangement with terminators (and the blue shading which indicates the range of the C.V. in this arrangement) serves as a reference in all plots. # HL4348 had YFP expression values less than zero after background autofluorescence subtraction at 0, 1, 5 and 10  $\mu$ M IPTG; these values are therefore not shown on the plot.
