# Supplementary material
Source: PubMed Central journal article supplement (PMC3567736)
Supplement: b663533dcb0da0bebe779b150d2a48b1_genetics.112.147199-5.pdf [file b663533dcb0da0bebe779b150d2a48b1_genetics.112.147199-5.pdf]

**A**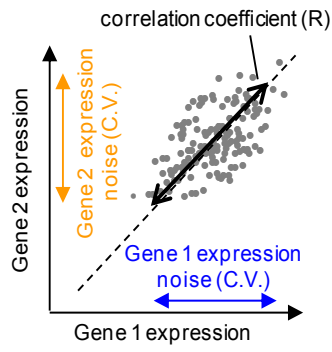**B**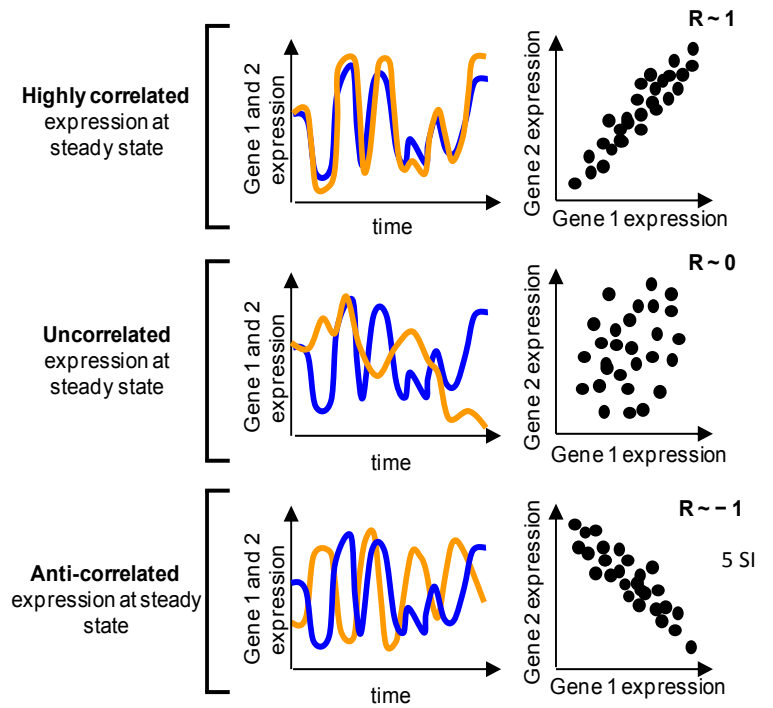

**Figure S6** Description of the correlation coefficient. **(A)** Scatter plot of Gene 1 and Gene 2 expression showing the noise and the correlation coefficient ( $R$ ). **(B)** Diagrams showing the steady state expression of Gene 1 (blue lines) and Gene 2 (gold lines) as a function of time and a corresponding scatter plot for highly correlated expression (top), uncorrelated expression (middle) and anti-correlated expression (bottom).
