# Supplementary material
Source: PubMed Central journal article supplement (PMC3567736)
Supplement: c10405828560485cd32f07d0dc539aa9_genetics.112.147199-11.pdf [file c10405828560485cd32f07d0dc539aa9_genetics.112.147199-11.pdf]

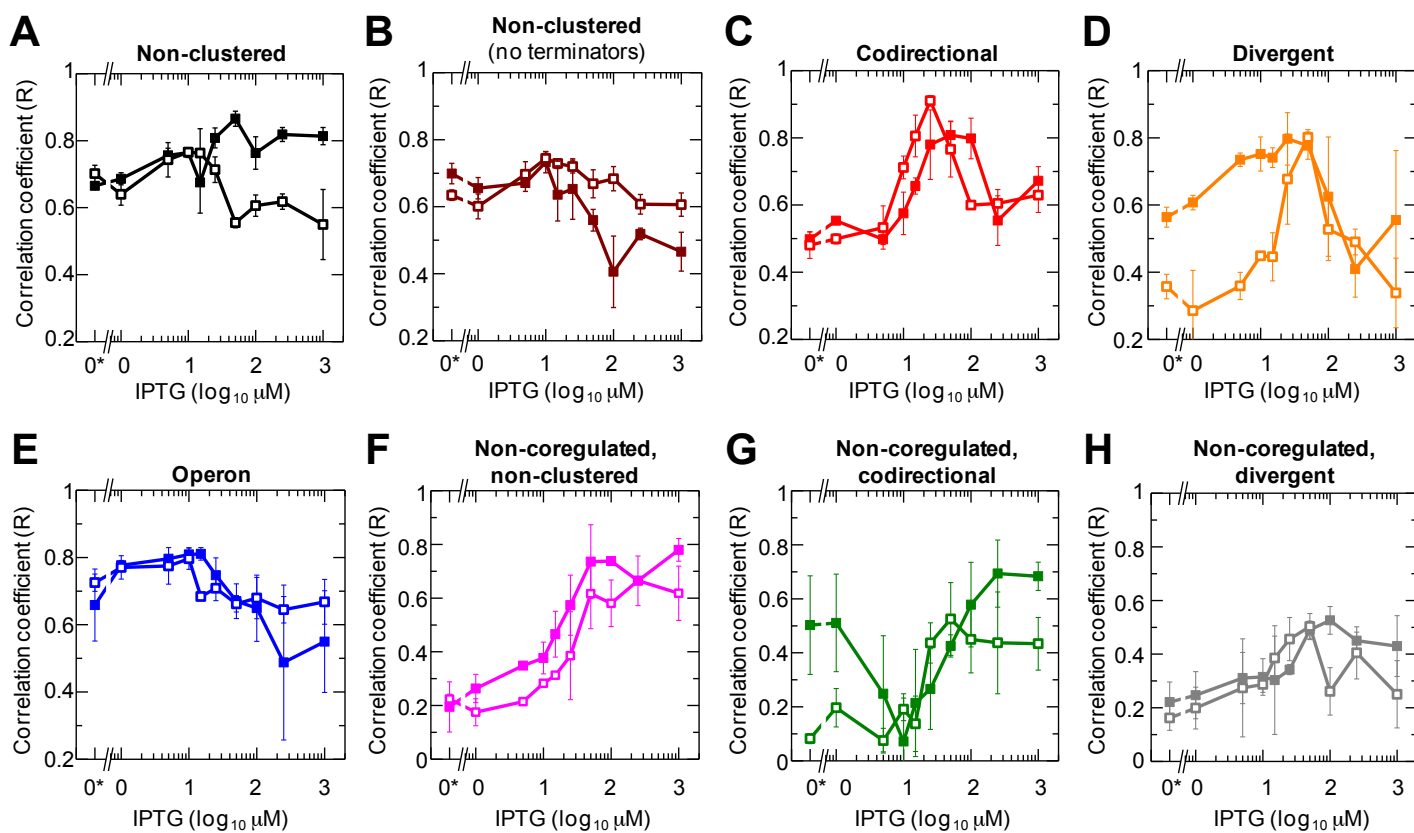

**Figure S7** Correlation coefficient ( $R$ ) as a function of the IPTG concentration for clustered and non-clustered gene arrangements with only cells within 2 S.D. of the mean included in the analysis. (A-H) Each panel shows the correlation coefficient for a different gene arrangement. Data symbols indicate the gene arrangements shown in **Figures 1A** and **3A**. In addition we include non-clustered genes without terminators (maroon symbols, **panel B**). Error bars indicate the s.e.m. (number of replicates is stated in the legends of **Figures 1** and **3**). 0\* indicates an actual value of zero not  $10^0$ .
