# Supplementary material
Source: PubMed Central journal article supplement (PMC3567736)
Supplement: ceabc565c1275d00405e67fd48690264_genetics.112.147199-6.pdf [file ceabc565c1275d00405e67fd48690264_genetics.112.147199-6.pdf]

**Table S3 Oligonucleotides used for chromosomal integrations**

| Oligonucleotide | Description                                                                 | Sequence (5' to 3')                                                              |
|-----------------|-----------------------------------------------------------------------------|----------------------------------------------------------------------------------|
| CYFPendpKD1F*   | integrate a second gene downstream of <i>cfp</i> or <i>yfp</i>              | tcgtgaccgccccgggatcactcacggcatggacgagctgtacaagtaagttg<br>aggctggagctgcttc        |
| CYFPgalKR*      | integrate <i>cfp</i> or <i>yfp</i> with no terminators at <i>galk</i>       | gtttgcgcgagtcagcgatatccattttcgcaatccggagtgaagaattactt<br>gtacagctcgccatgcc       |
| CYFPintCR*      | integrate <i>cfp</i> or <i>yfp</i> with no terminators at <i>intS</i>       | ccgtagatttacagttcgtcatggttcgcttcagatcgttgacagccgactacttg<br>tacagctcgccatgcc     |
| GalkCoIER*      | integrate <i>cfp</i> or <i>yfp</i> with terminators at <i>galk</i>          | gtttgcgcgagtcagcgatatccattttcgcaatccggagtgaagaagctg<br>ataccgctcggcagccgaacg     |
| GalkFRCCYFPR*   | integrate <i>yfp</i> with no terminators at <i>galM</i>                     | cggaagagctggcgctgccgtacagcaagctgctgctgaacaatatgaattact<br>tgtacagctcgccatgcc     |
| GalMFtermOext*  | integrate <i>yfp</i> at <i>galM</i>                                         | ctggtgatttgaacaatatgagataaagccctcatgacgagggcgtaacaatca<br>acaggagtccaagcagctctcg |
| GtrBFtermOext*  | integrate <i>cfp</i> at <i>gtrAB</i>                                        | tcatttttgactctcttgatgatgatttcggcgctttttggtttcaaatcaacagg<br>agtccaagcagctctcg    |
| IntCCoIER*      | integrate <i>cfp</i> or <i>yfp</i> with terminators at <i>intS</i>          | ccgtagatttacagttcgtcatggttcgcttcagatcgttgacagcccaagctga<br>taccgctcggcagccgaacg  |
| IntCFRCCYFPR*   | integrate <i>cfp</i> with no terminators at <i>gtrAB</i>                    | tggcggactggcttgatgagaaggtggagtgagcgaccttaacaactatttact<br>tgtacagctcgccatgcc     |
| PKD1FgalKF*     | integrate <i>cfp</i> or <i>yfp</i> at <i>galk</i>                           | ttcatattgttcagcgacgcttgctgtacggcaggcaccagctcttcgggtgtag<br>gctggagctgcttc        |
| PKD1FintCF*     | integrate <i>cfp</i> or <i>yfp</i> at <i>intS</i>                           | atagttgtaagtgctcactccacttctcatcaagccagctccgcccagtgtag<br>gctggagctgcttc          |
| RevgalMCoIER    | integrate <i>cfp</i> with terminators at <i>galM</i>                        | ctggtgatttgaacaatatgagataaagccctcatgacgagggcgtaacaagct<br>gataccgctcggcagccgaacg |
| RevgalMpKD1F§   | integrate <i>cfp</i> at <i>galM</i>                                         | ggtattaagagactttttacgtttgtaaacatcacaaggagcaggacagtgta<br>ggctggagctgcttc         |
| RevgtrApKD1F§   | integrate <i>yfp</i> at <i>gtrAB</i>                                        | aagactggatgatagacttcattcctttgattattagctgatagaagaagtgtag<br>gctggagctgcttc        |
| RevgtrBCoIER    | integrate <i>yfp</i> with terminators at <i>gtrAB</i>                       | tcatttttgactctcttgatgatgatttcggcgctttttggtttcaagctgatac<br>cgctcggcagccgaacg     |
| T710RBSpKD4R    | remove T1 terminator::PLlacO-1 from codirectional genes to create an operon | ctagccatatgtatatctccttcttaaagttaaacaaaattatttctagaattccgg<br>ggatccgctgacc       |

Previously reported oligonucleotides in Lim *et al.*, 2011 (\*) and Block *et al.* 2012 (§).
