# Supplementary material
Source: PubMed Central journal article supplement (PMC3567736)
Supplement: cfc0f69c8e9f71e289e182635ca4419a_genetics.112.147199-13.pdf [file cfc0f69c8e9f71e289e182635ca4419a_genetics.112.147199-13.pdf]

**Table S4 Maximum and minimum expression levels and parameters obtained from fits to the Hill function**

| Group                            | Fluorescent reporter, construction (strain) ‡                                                     | Max*        | Min*       | $\alpha$   | $\delta$  | K          | n           | Reduced $\chi^2$ (R <sup>2</sup> ) |
|----------------------------------|---------------------------------------------------------------------------------------------------|-------------|------------|------------|-----------|------------|-------------|------------------------------------|
| Non-clustered                    | <b>CFP</b> , PLlacO-1:: <i>cfp</i> at <i>intS</i> & PLlacO-1:: <i>yfp</i> at <i>galk</i> (HL1852) | 2263 ± 253  | 463 ± 16   | 2145 ± 70  | 479 ± 9   | 24.9 ± 2.0 | 1.30 ± 0.09 | 1.34<br>(>0.99)                    |
| Non-clustered                    | <b>YFP</b> , PLlacO-1:: <i>cfp</i> at <i>intS</i> & PLlacO-1:: <i>yfp</i> at <i>galk</i> (HL1852) | 824 ± 213   | 93 ± 10    | 771 ± 87   | 96 ± 8    | 24.8 ± 4.1 | 1.54 ± 0.19 | 0.13<br>(>0.99)                    |
| Non-clustered                    | <b>CFP</b> , PLlacO-1:: <i>cfp</i> at <i>galk</i> & PLlacO-1:: <i>yfp</i> at <i>intS</i> (HL3360) | 1088 ± 19   | 132 ± 14   | 927 ± 47   | 135 ± 7   | 20.1 ± 2.5 | 1.71 ± 0.26 | 0.07<br>(>0.99)                    |
| Non-clustered                    | <b>YFP</b> , PLlacO-1:: <i>cfp</i> at <i>galk</i> & PLlacO-1:: <i>yfp</i> at <i>intS</i> (HL3360) | 1180 ± 84   | 90 ± 12    | 1122 ± 89  | 92 ± 8    | 27.0 ± 3.0 | 1.58 ± 0.14 | 0.09<br>(>0.99)                    |
| Non-clustered                    | <b>CFP</b> , PLlacO-1:: <i>cfp</i> at <i>intS</i> & PLlacO-1:: <i>yfp</i> at <i>galk</i> (HL5086) | 5622 ± 119  | 449 ± 23   | 5175 ± 88  | 524 ± 10  | 19.8 ± 0.5 | 1.91 ± 0.06 | 6.14<br>(>0.99)                    |
| Non-clustered                    | <b>YFP</b> , PLlacO-1:: <i>cfp</i> at <i>intS</i> & PLlacO-1:: <i>yfp</i> at <i>galk</i> (HL5086) | 3901 ± 507  | 221 ± 66   | 3655 ± 86  | 282 ± 9   | 19.2 ± 0.6 | 2.04 ± 0.08 | 3.47<br>(>0.99)                    |
| Non-clustered                    | <b>CFP</b> , PLlacO-1:: <i>cfp</i> at <i>intS</i> & PLlacO-1:: <i>yfp</i> at <i>galk</i> (HL5087) | 7721 ± 1482 | 1470 ± 499 | 6285 ± 292 | 1464 ± 27 | 18.1 ± 2.3 | 1.39 ± 0.12 | 0.19<br>(>0.99)                    |
| Non-clustered                    | <b>YFP</b> , PLlacO-1:: <i>cfp</i> at <i>intS</i> & PLlacO-1:: <i>yfp</i> at <i>galk</i> (HL5087) | 3161 ± 512  | 340 ± 16   | 2975 ± 322 | 341 ± 15  | 31.7 ± 7.2 | 1.53 ± 0.32 | 0.10<br>(>0.99)                    |
| Non-coregulated, non-clustered # | <b>CFP</b> , PLlacO-1:: <i>cfp</i> at <i>intS</i> & PLtetO-1:: <i>yfp</i> at <i>galk</i> (HL5113) | 4258 ± 223  | 320 ± 10   | 4075 ± 273 | 330 ± 26  | 19.9 ± 3.2 | 1.80 ± 0.27 | 0.25<br>(>0.99)                    |
| Non-coregulated, non-clustered # | <b>YFP</b> , PLlacO-1:: <i>yfp</i> at <i>galk</i> & PLtetO-1:: <i>cfp</i> at <i>intS</i> (HL5149) | 3028 ± 230  | 225 ± 22   | 3165 ± 321 | 237 ± 15  | 31.0 ± 6.7 | 1.51 ± 0.30 | 1.11<br>(0.99)                     |
| Operon (1 <sup>st</sup> gene)    | <b>CFP</b> , PLlacO-1:: <i>cfp-yfp</i> at <i>intS</i> (HL3573)                                    | 6881 ± 94   | 701 ± 56   | 6320 ± 300 | 713 ± 27  | 25.8 ± 3.0 | 1.51 ± 0.14 | 0.76<br>(>0.99)                    |
| Operon (1 <sup>st</sup> gene)    | <b>YFP</b> , PLlacO-1:: <i>yfp-cfp</i> at <i>galk</i> (HL3578)                                    | 2913 ± 241  | 120 ± 15   | 2847 ± 212 | 123 ± 15  | 17.6 ± 2.7 | 1.67 ± 0.36 | 0.13<br>(>0.99)                    |

\*Actual values obtained at 0 and 1 mM IPTG as opposed to fit values. ‡ *lacI* is in the native position in all strains. # Hill function was fitted only to the gene under the control of PLlacO-1.

**Table S4 continued Maximum and minimum expression levels and parameters obtained from fits to the Hill function**

| Group                                | Fluorescent reporter, construction (strain) ‡                                                                         | Max*       | Min*     | $\alpha$   | $\delta$ | K           | n           | Reduced $\chi^2$ (R <sup>2</sup> ) |
|--------------------------------------|-----------------------------------------------------------------------------------------------------------------------|------------|----------|------------|----------|-------------|-------------|------------------------------------|
| Operon (2 <sup>nd</sup> gene)        | <b>CFP</b> , P <sub>LlacO-1</sub> :: <i>yfp-cfp</i> at <i>galk</i> (HL3578)                                           | 2671 ± 198 | 302 ± 39 | 2395 ± 260 | 308 ± 27 | 14.6 ± 4.2  | 1.75 ± 0.44 | 0.06 (>0.99)                       |
| Operon (2 <sup>nd</sup> gene)        | <b>YFP</b> , P <sub>LlacO-1</sub> :: <i>cfp-yfp</i> at <i>intS</i> (HL3573)                                           | 995 ± 48   | 162 ± 7  | 1080 ± 232 | 165 ± 15 | 29.1 ± 12.0 | 2.16 ± 1.26 | 0.19 (0.98)                        |
| Codirectional (1 <sup>st</sup> gene) | <b>CFP</b> , P <sub>LlacO-1</sub> :: <i>cfp</i> ::T1 term::P <sub>LlacO-1</sub> :: <i>yfp</i> at <i>intS</i> (HL3515) | 6621 ± 326 | 82 ± 15  | 5934 ± 219 | 85 ± 15  | 45.4 ± 2.3  | 3.59 ± 0.54 | 0.74 (>0.99)                       |
| Codirectional (1 <sup>st</sup> gene) | <b>YFP</b> , P <sub>LlacO-1</sub> :: <i>yfp</i> ::T1 term::P <sub>LlacO-1</sub> :: <i>cfp</i> at <i>galk</i> (HL3546) | 2913 ± 241 | 38 ± 6   | 3171 ± 176 | 39 ± 15  | 36.3 ± 3.3  | 4.06 ± 0.92 | 0.03 (>0.99)                       |
| Codirectional (2 <sup>nd</sup> gene) | <b>CFP</b> , P <sub>LlacO-1</sub> :: <i>yfp</i> ::T1 term::P <sub>LlacO-1</sub> :: <i>cfp</i> at <i>galk</i> (HL3546) | 6169 ± 222 | 177 ± 14 | 6034 ± 271 | 180 ± 25 | 34.4 ± 2.2  | 3.97 ± 0.64 | 0.07 (>0.99)                       |
| Codirectional (2 <sup>nd</sup> gene) | <b>YFP</b> , P <sub>LlacO-1</sub> :: <i>cfp</i> ::T1 term::P <sub>LlacO-1</sub> :: <i>yfp</i> at <i>intS</i> (HL3515) | 3138 ± 244 | 56 ± 0   | 3864 ± 60  | 60 ± 6   | 47.3 ± 0.6  | 3.53 ± 0.27 | 4.35 (>0.99)                       |
| Non-coregulated, codirectional#      | <b>CFP</b> , P <sub>LlacO-1</sub> :: <i>cfp</i> ::T1 term::P <sub>LtetO-1</sub> :: <i>yfp</i> at <i>intS</i> (HL3953) | 6298 ± 326 | 144 ± 29 | 5995 ± 271 | 154 ± 27 | 15.9 ± 1.9  | 1.63 ± 0.16 | 0.83 (>0.99)                       |
| Non-coregulated, codirectional#      | <b>YFP</b> , P <sub>LlacO-1</sub> :: <i>yfp</i> ::T1 term::P <sub>LtetO-1</sub> :: <i>cfp</i> at <i>galk</i> (HL3954) | 3425 ± 119 | 239 ± 20 | 3397 ± 213 | 242 ± 15 | 17.7 ± 2.3  | 1.67 ± 0.30 | 0.15 (>0.99)                       |
| Divergent                            | <b>CFP</b> , P <sub>LlacO-1</sub> :: <i>cfp</i> & P <sub>LlacO-1</sub> :: <i>yfp</i> at <i>intS</i> (HL4343)          | 2429 ± 76  | 56 ± 8   | 2366 ± 62  | 62 ± 3   | 61.0 ± 3.5  | 2.64 ± 0.12 | 1.95 (>0.99)                       |
| Divergent                            | <b>YFP</b> , P <sub>LlacO-1</sub> :: <i>cfp</i> & P <sub>LlacO-1</sub> :: <i>yfp</i> at <i>intS</i> (HL4343)          | 3934 ± 58  | 34 ± 4   | 3385 ± 60  | 46 ± 2   | 61.7 ± 2.4  | 3.11 ± 0.12 | 9.20 (0.99)                        |
| Divergent                            | <b>CFP</b> , P <sub>LlacO-1</sub> :: <i>cfp</i> & P <sub>LlacO-1</sub> :: <i>yfp</i> at <i>galk</i> (HL4348)          | 8316 ± 633 | 98 ± 13  | 7973 ± 61  | 127 ± 2  | 64.0 ± 1.0  | 3.04 ± 0.05 | 39.73 (0.99)                       |
| Divergent                            | <b>YFP</b> , P <sub>LlacO-1</sub> :: <i>cfp</i> & P <sub>LlacO-1</sub> :: <i>yfp</i> at <i>galk</i> (HL4348)          | 811 ± 126  | -4 ± 5   | 750 ± 49   | 5.0 ± 2  | 48.9 ± 9.1  | 4.47 ± 1.25 | 0.73 (0.99)                        |
| Non-coregulated, divergent#          | <b>CFP</b> , P <sub>LlacO-1</sub> :: <i>cfp</i> & P <sub>LtetO-1</sub> :: <i>yfp</i> at <i>intS</i> (HL4342)          | 1751 ± 876 | 342 ± 17 | 2027 ± 35  | 341 ± 4  | 9.6 ± 0.2   | 1.42 ± 0.03 | 10.52 (>0.99)                      |
| Non-coregulated, divergent#          | <b>YFP</b> , P <sub>LlacO-1</sub> :: <i>yfp</i> & P <sub>LtetO-1</sub> :: <i>cfp</i> at <i>galk</i> (HL4302)          | 786 ± 132  | 69 ± 7   | 797 ± 50   | 69 ± 4   | 15.3 ± 1.4  | 1.24 ± 0.07 | 3.83 (>0.99)                       |

\*Actual values obtained at 0 and 1 mM IPTG as opposed to fit values. ‡ *lacI* is in the native position in all strains. # Hill function was fitted only to the gene under the control of P<sub>LlacO-1</sub>.
