# Supplementary material
Source: PubMed Central journal article supplement (PMC3567736)
Supplement: da6e7e19899bcfece8d52a1232ffb20a_genetics.112.147199-9.pdf [file da6e7e19899bcfece8d52a1232ffb20a_genetics.112.147199-9.pdf]

**LEGEND**

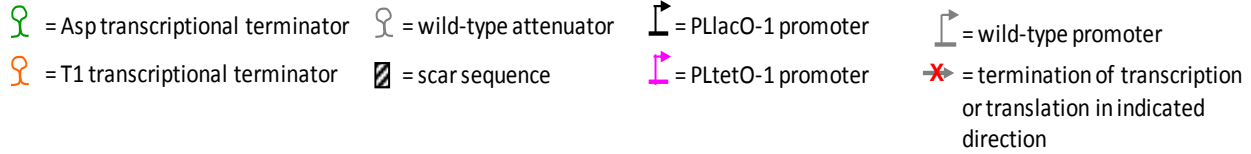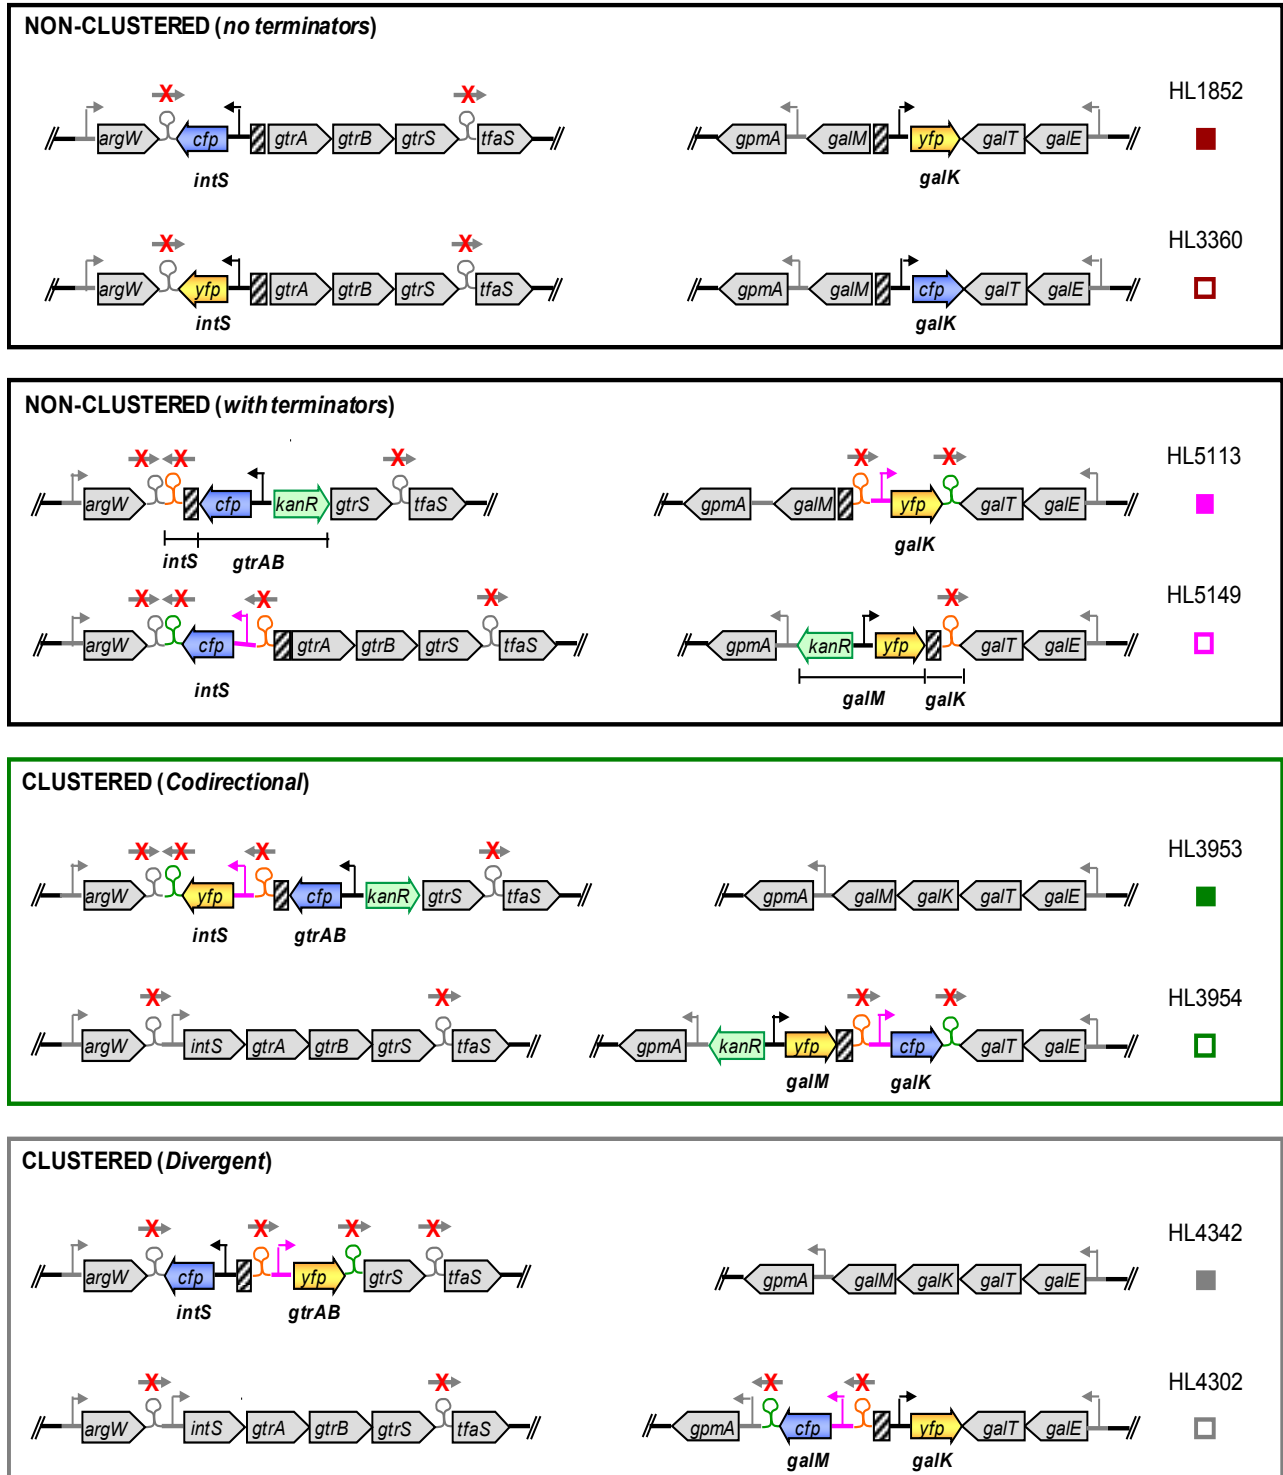

**Figure S2** Details of the non-clustered and clustered gene arrangements shown in **Figure 3A** and non-clustered genes without terminators (filled and unfilled maroon symbols).
