# Supplementary material
Source: PubMed Central journal article supplement (PMC3567736)
Supplement: eb0059eaa5224c28f728ba95cd21c3de_genetics.112.147199-1.pdf [file eb0059eaa5224c28f728ba95cd21c3de_genetics.112.147199-1.pdf]

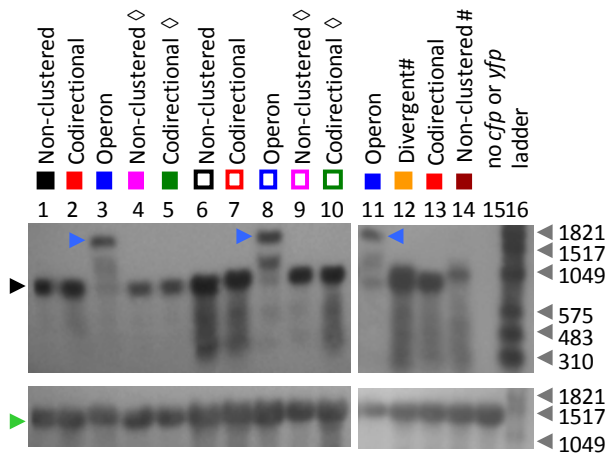

**Figure S3** RNA measurements by Northern blotting. Error bars indicate the s.e.m. of duplicate measurements. Symbols indicate the gene arrangements in **Figure 1A** and **Figure 3A**. Representative Northern blot showing hybridization of a *cfp* probe which binds both *cfp* and *yfp* mRNAs (upper) and a 16S RNA probe (lower). Measurements were performed on duplicate sets of samples. # indicates at least one of the mRNA transcripts does not have a terminator. The maroon symbol represents a non-clustered gene arrangement where *cfp* at *intS* and *yfp* at *galK* do not have terminators (HL1852). Blue arrowheads indicate the full length mRNA for operons. Black arrowhead indicates the single gene mRNA.  $\diamond$  indicates one of the promoters is PLtetO-1. The green arrowhead indicates the 16S RNA. The grey arrowheads indicate mRNAs in the size ladder. Contrast and brightness were adjusted solely to enhance visualization of the printed figure; no bands were obscured or selectively enhanced.
