# Supplementary material
Source: PubMed Central journal article supplement (PMC3567736)
Supplement: f2e83c5b309b5bd74306325f08f096d8_genetics.112.147199-8.pdf [file f2e83c5b309b5bd74306325f08f096d8_genetics.112.147199-8.pdf]

**Table S1 Strains**

| Strain  | Description                                                                                  | <i>cfp</i><br>position | <i>yfp</i><br>position | Structure                                                            |
|---------|----------------------------------------------------------------------------------------------|------------------------|------------------------|----------------------------------------------------------------------|
| MG1655  | Yale <i>E. coli</i> genetic stock center (CGSC#7740)                                         | N/A                    | N/A                    | N/A                                                                  |
| HL716*  | MG1655 + <i>lacIq</i> at <i>intS</i> site                                                    | N/A                    | N/A                    | N/A                                                                  |
| HL1745§ | MG1655 + PLlacO-1::T710:: <i>cfp</i> at <i>intS</i>                                          | <i>intS</i>            | N/A                    | Single color                                                         |
| HL1852§ | HL1745 + PLlacO-1::T710:: <i>yfp</i> at <i>galk</i>                                          | <i>intS</i>            | <i>galk</i>            | Non-clustered                                                        |
| HL1951§ | MG1655 + PLlacO-1::T710:: <i>yfp</i> at <i>galk</i>                                          | N/A                    | <i>galk</i>            | Single color                                                         |
| HL2028* | HL1852 + $\Delta$ <i>lacI</i>                                                                | <i>intS</i>            | <i>galk</i>            | Non-clustered                                                        |
| HL2960  | MG1655 + PLlacO-1::T710:: <i>cfp</i> at <i>galk</i>                                          | N/A                    | <i>galk</i>            | Single color                                                         |
| HL3355* | MG1655 + KanR::PLlacO-1::T710:: <i>cfp</i> at <i>gtrAB</i>                                   | <i>gtrAB</i>           | N/A                    | Single color                                                         |
| HL3360  | HL2960 + PLlacO-1::T710:: <i>yfp</i> at <i>intS</i>                                          | <i>galk</i>            | <i>intS</i>            | Non-clustered                                                        |
| HL3368* | MG1655 + KanR::PLlacO-1::T710:: <i>yfp</i> at <i>galM</i>                                    | N/A                    | <i>galM</i>            | Single color                                                         |
| HL3515* | HL3355 + T1 terminator::PLlacO-1::T710:: <i>yfp</i> ::Asp terminator at <i>intS</i>          | <i>gtrAB</i>           | <i>intS</i>            | Codirectional: <i>cfp</i> upstream of <i>yfp</i>                     |
| HL3546* | HL3368 + T1 terminator::PLlacO-1::T710:: <i>cfp</i> ::Asp terminator at <i>galk</i>          | <i>galk</i>            | <i>galM</i>            | Codirectional: <i>yfp</i> upstream of <i>cfp</i>                     |
| HL3573  | HL3515 + ( $\Delta$ T1 terminator::PLlacO-1)                                                 | <i>gtrAB</i>           | <i>intS</i>            | Operon: <i>cfp</i> upstream of <i>yfp</i>                            |
| HL3578  | HL3546 + ( $\Delta$ T1 terminator::PLlacO-1)                                                 | <i>galk</i>            | <i>galM</i>            | Operon: <i>yfp</i> upstream of <i>cfp</i>                            |
| HL3640  | HL3515 + $\Delta$ <i>lacI</i>                                                                | <i>gtrAB</i>           | <i>intS</i>            | Codirectional: <i>cfp</i> upstream of <i>yfp</i>                     |
| HL3641  | HL3546 + $\Delta$ <i>lacI</i>                                                                | <i>galk</i>            | <i>galM</i>            | Codirectional: <i>yfp</i> upstream of <i>cfp</i>                     |
| HL3642  | HL3573 + $\Delta$ <i>lacI</i>                                                                | <i>gtrAB</i>           | <i>intS</i>            | Operon: <i>cfp</i> upstream of <i>yfp</i>                            |
| HL3643  | HL3578 + $\Delta$ <i>lacI</i>                                                                | <i>galk</i>            | <i>galM</i>            | Operon: <i>yfp</i> upstream of <i>cfp</i>                            |
| HL3953  | HL3355 + T1 terminator::PLtetO-1::T710:: <i>yfp</i> ::Asp terminator at <i>intS</i>          | <i>gtrAB</i>           | <i>intS</i>            | Non-coregulated,<br>codirectional: <i>cfp</i> upstream of <i>yfp</i> |
| HL3954  | HL3368 + T1 terminator::PLtetO-1::T710:: <i>cfp</i> ::Asp terminator at <i>galk</i>          | <i>galk</i>            | <i>galM</i>            | Non-coregulated,<br>codirectional: <i>yfp</i> upstream of <i>cfp</i> |
| HL4302  | HL1951 + T1 terminator::PLtetO-1::T710:: <i>cfp</i> ::Asp terminator inserted at <i>galM</i> | <i>galM</i>            | <i>galk</i>            | Non-coregulated, divergent                                           |

Previously reported strains in Lim *et al.* 2011 (\*) and Block *et al.* 2012 (§).

Table S1 continued Strains

| Strain | Description                                                                          | <i>cfp</i><br>position | <i>yfp</i><br>position | Structure                      |
|--------|--------------------------------------------------------------------------------------|------------------------|------------------------|--------------------------------|
| HL4342 | HL1745 + T1 terminator::PLtetO-1::T710::yfp::Asp terminator inserted at <i>gtrAB</i> | <i>intS</i>            | <i>gtrAB</i>           | Non-coregulated, divergent     |
| HL4343 | HL1745 + PLlacO-1::T710::yfp::T7 terminator::T1 terminator inserted at <i>gtrAB</i>  | <i>intS</i>            | <i>gtrAB</i>           | Divergent                      |
| HL4348 | HL1951 + PLlacO-1::T710::cfp::T7 terminator::T1 terminator inserted at <i>galM</i>   | <i>galM</i>            | <i>galK</i>            | Divergent                      |
| HL5056 | HL3355 + T1 terminator at <i>intS</i>                                                | <i>gtrAB</i>           | N/A                    | Single color                   |
| HL5057 | HL3368 + T1 terminator at <i>galK</i>                                                | N/A                    | <i>galM</i>            | Single color                   |
| HL5086 | HL5056 + T1 terminator::PLlacO-1::T710::yfp::Asp terminator at <i>galK</i>           | <i>gtrAB</i>           | <i>galK</i>            | Non-clustered                  |
| HL5087 | HL5057 + T1 terminator::PLlacO-1::T710::cfp::Asp terminator at <i>intS</i>           | <i>intS</i>            | <i>galM</i>            | Non-clustered                  |
| HL5113 | HL5056 + T1 terminator::PLtetO-1::T710::yfp::Asp terminator at <i>galK</i>           | <i>gtrAB</i>           | <i>galK</i>            | Non-coregulated, non-clustered |
| HL5149 | HL5057 + T1 terminator::PLtetO-1::T710::cfp::Asp terminator at <i>intS</i>           | <i>intS</i>            | <i>galM</i>            | Non-coregulated, non-clustered |
| HL5553 | HL5086 + $\Delta lacI$                                                               | <i>gtrAB</i>           | <i>galK</i>            | Non-clustered                  |
| HL5554 | HL5087 + $\Delta lacI$                                                               | <i>intS</i>            | <i>galM</i>            | Non-clustered                  |
| HL5555 | HL4343 + $\Delta lacI$                                                               | <i>intS</i>            | <i>gtrAB</i>           | Divergent                      |
| HL5556 | HL4348 + $\Delta lacI$                                                               | <i>galM</i>            | <i>galK</i>            | Divergent                      |
